# Supplementary material for: Energy at Origins: Favorable Thermodynamics of Biosynthetic Reactions in the Last Universal Common Ancestor (LUCA)
Source: Front Microbiol. 2021 Dec 13;12:793664. doi: 10.3389/fmicb.2021.793664 (PMC8710812; doi:10.3389/fmicb.2021.793664)
Supplement: Supplementary file 1 [file Table_1.xlsx]

## Sheet: SI Table 1
Supplementary Table 1. Biosynthetic core comprising 402 metabolic reactions which are polarized in the direction of cell synthesis and needed to synthesize cofactors, bases and amino acids from H2, CO2, NH3, Pi, H2O and H2S.
The reactions are given in KEGG format. The synthesis in which they participate is indicated as well as the associated KEGG Module, Enzyme Commission number and KEGG Orthology identifier.
Reaction ID	Reaction equation (KEGG compound)	Reaction equation (Compound name) left	Reaction equation (Compound name) right	Synthesis Target	KEGG Module	Enzyme Commission number	KEGG Orthology	Comment
R00258	C00022 + C00025 <=> C00041 + C00026	Pyruvate + L-Glutamate	L-Alanine + 2-Oxoglutarate	Alanine	added manually	2.6.1.2	K00814,K14260,K14272
R00400	C00022 + C00049 <=> C00041 + C00036	Pyruvate + L-Aspartate	L-Alanine + Oxaloacetate	Alanine	added manually	2.6.1.12	-
R00369	C00022 + C00037 <=> C00041 + C00048	Pyruvate + Glycine	L-Alanine + Glyoxylate	Alanine	added manually	2.6.1.44	K00827,K00830,K14272
R00396	C00022 + C00014 + C00004 + C00080 <=> C00041 + C00003 + C00001	Pyruvate + Ammonia + NADH + H+	L-Alanine + NAD+ + H2O	Alanine	added manually	1.4.1.1	K00259,K19244
R09107	C15532 + C00001 <=> C00033 + C00327	N-Acetyl-L-citrulline + H2O	Acetate + L-Citrulline	Arginine	M00845	3.5.1.16	K01438
R00259	C00024 + C00025 <=> C00010 + C00624	Acetyl-CoA + L-Glutamate	CoA + N-Acetyl-L-glutamate	Arginine	M00845	2.3.1.1	K00618,K00619,K00620,K11067,K14681,K14682,K22476,K22477,K22478
R07245	C00169 + C00437 <=> C00009 + C15532	Carbamoyl phosphate + N-Acetylornithine	Orthophosphate + N-Acetyl-L-citrulline	Arginine	M00845	2.1.3.9	K09065
R02283	C01250 + C00025 <=> C00437 + C00026	N-Acetyl-L-glutamate 5-semialdehyde + L-Glutamate	N-Acetylornithine + 2-Oxoglutarate	Arginine	M00845	2.6.1.11	K00818,K00821
R03443	C04133 + C00005 + C00080 <=> C01250 + C00009 + C00006	N-Acetyl-L-glutamate 5-phosphate + NADPH + H+	N-Acetyl-L-glutamate 5-semialdehyde + Orthophosphate + NADP+	Arginine	M00845	1.2.1.38	K00145,K12659
R02649	C00002 + C00624 <=> C00008 + C04133	ATP + N-Acetyl-L-glutamate	ADP + N-Acetyl-L-glutamate 5-phosphate	Arginine	M00845	2.7.2.8	K00930,K12659,K22478
R00149	2 C00002 + C00014 + C00011 + C00001 <=> 2 C00008 + C00009 + C00169	2 ATP + Ammonia + CO2 + H2O	2 ADP + Orthophosphate + Carbamoyl phosphate	Arginine	M00029	6.3.4.16	K01948
R00551	C00062 + C00001 <=> C00077 + C00086	L-Arginine + H2O	L-Ornithine + Urea	Arginine	M00029	3.5.3.1	K01476
R01954	C00002 + C00327 + C00049 <=> C00020 + C00013 + C03406	ATP + L-Citrulline + L-Aspartate	AMP + Diphosphate + N-(L-Arginino)succinate	Arginine	M00029	6.3.4.5	K01940
R01398	C00169 + C00077 <=> C00009 + C00327	Carbamoyl phosphate + L-Ornithine	Orthophosphate + L-Citrulline	Arginine	M00029	2.1.3.3	K00611
R01086	C03406 <=> C00122 + C00062	N-(L-Arginino)succinate	Fumarate + L-Arginine	Arginine	M00029	4.3.2.1	K01755,K14681
R00669	C00437 + C00001 <=> C00033 + C00077	N-Acetylornithine + H2O	Acetate + L-Ornithine	Arginine	added manually	3.5.1.14,3.5.1.16	K01438,K14677
R00578	C00002 + C00049 + C00064 + C00001 <=> C00020 + C00013 + C00152 + C00025	ATP + L-Aspartate + L-Glutamine + H2O	AMP + Diphosphate + L-Asparagine + L-Glutamate	Asparagine	added manually	6.3.5.4	K01953
R00483	C00002 + C00049 + C00014 <=> C00020 + C00013 + C00152	ATP + L-Aspartate + Ammonia	AMP + Diphosphate + L-Asparagine	Asparagine	added manually	6.3.1.1,6.3.5.4	K01914
R00482	C00002 + C00049 + C00014 <=> C00008 + C00009 + C00152	ATP + L-Aspartate + Ammonia	ADP + Orthophosphate + L-Asparagine	Asparagine	added manually	6.3.1.4	-
R00355	C00036 + C00025 <=> C00049 + C00026	Oxaloacetate + L-Glutamate	L-Aspartate + 2-Oxoglutarate	Aspartate	added manually	2.6.1.1	K00811,K00812,K00813,K11358,K14454,K14455
R01135	C00044 + C00130 + C00049 <=> C00035 + C00009 + C03794	GTP + IMP + L-Aspartate	GDP + Orthophosphate + N6-(1,2-Dicarboxyethyl)-AMP	Purine,ATP	M00049	6.3.4.4	K01939
R00127	C00002 + C00020 <=> 2 C00008	ATP + AMP	2 ADP	Purine,ATP	M00049	2.7.4.3	K00939,K18532,K18533
R01083	C03794 <=> C00122 + C00020	N6-(1,2-Dicarboxyethyl)-AMP	Fumarate + AMP	Purine,ATP	M00049	4.3.2.2	K01756
R00200	C00008 + C00074 <=> C00002 + C00022	ADP + Phosphoenolpyruvate	ATP + Pyruvate	Purine,ATP	M00049	2.7.1.40	K00873,K12406
R00333	C00201 + C00020 <=> C00454 + C00008	Nucleoside triphosphate + AMP	NDP + ADP	Purine,ATP	M00049	2.7.4.10	K00944
R03182	C00002 + C01037 + C00011 <=> C00008 + C00009 + C01909	ATP + 7,8-Diaminononanoate + CO2	ADP + Orthophosphate + Dethiobiotin	Biotin	M00123	6.3.3.3	K01935,K19562
R03231	C00019 + C01092 <=> C04425 + C01037	S-Adenosyl-L-methionine + 8-Amino-7-oxononanoate	S-Adenosyl-4-methylthio-2-oxobutanoate + 7,8-Diaminononanoate	Biotin	M00123	2.6.1.62	K00833,K19562
R10699	C00047 + C01092 <=> C04076 + C01037	L-Lysine + 8-Amino-7-oxononanoate	L-2-Aminoadipate 6-semialdehyde + 7,8-Diaminononanoate	Biotin	M00123	2.6.1.105	K19563
R01626	C00083 + C00229 <=> C00010 + C01209	Malonyl-CoA + Acyl-carrier protein	CoA + Malonyl-[acyl-carrier protein]	Biotin	added manually	2.3.1.39,2.3.1.85,2.3.1.86,2.3.1.-	K00645,K00665,K00668,K11533,K13935
R09543	C00019 + C01209 <=> C00021 + C19673	S-Adenosyl-L-methionine + Malonyl-[acyl-carrier protein]	S-Adenosyl-L-homocysteine + Malonyl-[acp] methyl ester	Biotin	M00572	2.1.1.197	K02169
R10115	C19673 + C01209 <=> C20372 + C00011 + C00229	Malonyl-[acp] methyl ester + Malonyl-[acyl-carrier protein]	3-Ketoglutaryl-[acp] methyl ester + CO2 + Acyl-carrier protein	Biotin	M00572	2.3.1.41,2.3.1.179	K00647,K09458
R10116	C20372 + C00005 + C00080 <=> C20373 + C00006	3-Ketoglutaryl-[acp] methyl ester + NADPH + H+	3-Hydroxyglutaryl-[acp] methyl ester + NADP+	Biotin	M00572	1.1.1.100	K00059
R10117	C20373 <=> C20374 + C00001	3-Hydroxyglutaryl-[acp] methyl ester	Enoylglutaryl-[acp] methyl ester + H2O	Biotin	M00572	4.2.1.59	K02372
R10118	C20374 + C00005 + C00080 <=> C20375 + C00006	Enoylglutaryl-[acp] methyl ester + NADPH + H+	Glutaryl-[acp] methyl ester + NADP+	Biotin	M00572	1.3.1.10	K00208
R10119	C20375 + C01209 <=> C20376 + C00011 + C00229	Glutaryl-[acp] methyl ester + Malonyl-[acyl-carrier protein]	3-Ketopimeloyl-[acp] methyl ester + CO2 + Acyl-carrier protein	Biotin	M00572	2.3.1.41,2.3.1.179	K00647,K09458
R10120	C20376 + C00005 + C00080 <=> C20377 + C00006	3-Ketopimeloyl-[acp] methyl ester + NADPH + H+	3-Hydroxypimeloyl-[acp] methyl ester + NADP+	Biotin	M00572	1.1.1.100	K00059
R10121	C20377 <=> C20378 + C00001	3-Hydroxypimeloyl-[acp] methyl ester	Enoylpimeloyl-[acp] methyl ester + H2O	Biotin	M00572	4.2.1.59	K02372
R10122	C20378 + C00005 + C00080 <=> C19846 + C00006	Enoylpimeloyl-[acp] methyl ester + NADPH + H+	Pimeloyl-[acyl-carrier protein] methyl ester + NADP+	Biotin	M00572	1.3.1.10	K00208
R09725	C19846 + C00001 <=> C19845 + C00132	Pimeloyl-[acyl-carrier protein] methyl ester + H2O	Pimeloyl-[acyl-carrier protein] + Methanol	Biotin	M00572	3.1.1.85	K02170,K09789,K19560,K19561
R10124	C19845 + C00041 <=> C01092 + C00229 + C00011	Pimeloyl-[acyl-carrier protein] + L-Alanine	8-Amino-7-oxononanoate + Acyl-carrier protein + CO2	Biotin	M00123	2.3.1.47	K00652
R01078	C01909 + C17023 + 2 C00019 + 2 C05359 + 2 C00080 <=> C00120 + 2 C00073 + 2 C05198	Dethiobiotin + Sulfur donor + 2 S-Adenosyl-L-methionine + 2 e- + 2 H+	Biotin + 2 L-Methionine + 2 5'-Deoxyadenosine	Biotin	M00123	2.8.1.6	K01012
R10866	C00024 + C00011 + C02745 <=> C00022 + C00010 + C02869	Acetyl-CoA + CO2 + Reduced flavodoxin	Pyruvate + CoA + Oxidized flavodoxin	Carbon fixation, rTCA	M00173	1.2.7.-	K03737
R10092	C00011 + C00001 <=> C00288 + C00080	CO2 + H2O	HCO3- + H+	Carbon fixation	added manually	4.2.1.1	K01672,K01673,K01674,K01743,K18245,K18246
R00742	C00002 + C00024 + C00288 <=> C00008 + C00009 + C00083	ATP + Acetyl-CoA + HCO3-	ADP + Orthophosphate + Malonyl-CoA	Carbon fixation	added manually	6.4.1.2	K01946,K01961,K01962,K01963,K01964,K02160,K11262,K11263,K15036,K15037,K18472,K18603,K18604,K18605,K19312,K22568
R00199	C00002 + C00022 + C00001 <=> C00020 + C00074 + C00009	ATP + Pyruvate + H2O	AMP + Phosphoenolpyruvate + Orthophosphate	Carbon fixation, rTCA	M00173	2.7.9.2	K01007
R00345	C00001 + C00074 + C00011 <=> C00009 + C00036	H2O + Phosphoenolpyruvate + CO2	Orthophosphate + Oxaloacetate	Carbon fixation, rTCA	M00173	4.1.1.31	K01595
R00206	C00002 + C00022 + C00009 <=> C00020 + C00074 + C00013	ATP + Pyruvate + Orthophosphate	AMP + Phosphoenolpyruvate + Diphosphate	Carbon fixation, rTCA	M00173	2.7.9.1	K01006
R00402	C00122 + C00004 + C00080 <=> C00042 + C00003	Fumarate + NADH + H+	Succinate + NAD+	Carbon fixation, rTCA	M00173	1.3.1.6	K18556,K18557,K18558,K18559,K18560
R00344	C00002 + C00022 + C00288 <=> C00008 + C00009 + C00036	ATP + Pyruvate + HCO3-	ADP + Orthophosphate + Oxaloacetate	Carbon fixation, rTCA	M00173	6.4.1.1	K01958,K01959,K01960
R00352	C00002 + C00158 + C00010 <=> C00008 + C00009 + C00024 + C00036	ATP + Citrate + CoA	ADP + Orthophosphate + Acetyl-CoA + Oxaloacetate	Carbon fixation, rTCA	M00173	2.3.3.8	K01648,K15230,K15231
R01322	C00002 + C00158 + C00010 <=> C00008 + C00009 + C00566	ATP + Citrate + CoA	ADP + Orthophosphate + (3S)-Citryl-CoA	Carbon fixation, rTCA	M00173	6.2.1.18	K15232,K15233
R01325	C00417 + C00001 <=> C00158	cis-Aconitate + H2O	Citrate	Carbon fixation, rTCA	M00173	4.2.1.3	K01681,K01682
R00405	C00002 + C00042 + C00010 <=> C00008 + C00009 + C00091	ATP + Succinate + CoA	ADP + Orthophosphate + Succinyl-CoA	Carbon fixation, rTCA	M00173	6.2.1.5	K01902,K01903
R00354	C00566 <=> C00024 + C00036	(3S)-Citryl-CoA	Acetyl-CoA + Oxaloacetate	Carbon fixation, rTCA	M00173	4.1.3.34	K15234
R01900	C00311 <=> C00417 + C00001	Isocitrate	cis-Aconitate + H2O	Carbon fixation, rTCA	M00173	4.2.1.3	K01681,K01682
R01082	C00149 <=> C00122 + C00001	(S)-Malate	Fumarate + H2O	Carbon fixation, rTCA	M00173	4.2.1.2	-
R00342	C00036 + C00004 + C00080 <=> C00149 + C00003	Oxaloacetate + NADH + H+	(S)-Malate + NAD+	Carbon fixation, rTCA	M00173	1.1.1.37,1.1.1.299	K00024,K00025,K00026
R00267	C00026 + C00011 + C00005 + C00080 <=> C00311 + C00006	2-Oxoglutarate + CO2 + NADPH + H+	Isocitrate + NADP+	Carbon fixation, rTCA	M00173	1.1.1.42	K00031
R01197	2 C00138 + C00091 + C00011 + 2 C00080 <=> 2 C00139 + C00026 + C00010	2 Reduced ferredoxin + Succinyl-CoA + CO2 + 2 H+	2 Oxidized ferredoxin + 2-Oxoglutarate + CoA	Carbon fixation, rTCA	M00173	1.2.7.3,1.2.7.11	K00174,K00175,K00176,K00177
R01196	2 C00138 + C00024 + C00011 + 2 C00080 <=> 2 C00139 + C00022 + C00010	2 Reduced ferredoxin + Acetyl-CoA + CO2 + 2 H+	2 Oxidized ferredoxin + Pyruvate + CoA	Carbon fixation, rTCA	M00173	1.2.7.1,1.2.7.11	K00169,K00170,K00171,K00172,K00174,K00175,K03737
R07168	C00143 + C00004 + C00080 <=> C00440 + C00003	5,10-Methylenetetrahydrofolate + NADH + H+	5-Methyltetrahydrofolate + NAD+	Carbon fixation, WL	M00377	1.5.1.20	K00297
R00943	C00101 + C00058 + C00002 <=> C00008 + C00009 + C00234	Tetrahydrofolate + Formate + ATP	ADP + Orthophosphate + 10-Formyltetrahydrofolate	Carbon fixation, WL	M00377	6.3.4.3	K00288,K01938,K13402
R01655	C00234 + C00080 <=> C00445 + C00001	10-Formyltetrahydrofolate + H+	5,10-Methenyltetrahydrofolate + H2O	Carbon fixation, WL	M00377	3.5.4.9	K00288,K01491,K01500,K13403
R01220	C00445 + C00005 <=> C00143 + C00006	5,10-Methenyltetrahydrofolate + NADPH	5,10-Methylenetetrahydrofolate + NADP+	Carbon fixation, WL	M00377	1.5.1.5	K00288,K00300,K01491
R00134	C00011 + C00005 + C00080 <=> C00058 + C00006	CO2 + NADPH + H+	Formate + NADP+	Carbon fixation, WL	M00377	1.17.1.10	K05299,K15022
R10243	C00440 + C00010 + C00237 <=> C00101 + C00024	5-Methyltetrahydrofolate + CoA + CO	Tetrahydrofolate + Acetyl-CoA	Carbon fixation, WL	M00377	2.1.1.258,2.3.1.169	K00194,K00197,14138,K15023
R07157	C00011 + 2 C00138 + 2 C00080 <=> C00237 + C00001 + 2 C00139	CO2 + 2 Reduced ferredoxin + 2 H+	CO + H2O + 2 Oxidized ferredoxin	Carbon fixation, WL	M00377	1.2.7.4	K00192,K00195,K00196,K00198
R04230	C00002 + C03492 + C00097 <=> C00020 + C00013 + C04352	ATP + D-4'-Phosphopantothenate + L-Cysteine	AMP + Diphosphate + (R)-4'-Phosphopantothenoyl-L-cysteine	CoA	M00120	6.3.2.51	K01922
R04231	C00063 + C03492 + C00097 <=> C00055 + C00013 + C04352	CTP + D-4'-Phosphopantothenate + L-Cysteine	CMP + Diphosphate + (R)-4'-Phosphopantothenoyl-L-cysteine	CoA	M00120	6.3.2.5	K13038,K21977
R02473	C00002 + C00522 + C00099 <=> C00020 + C00013 + C00864	ATP + (R)-Pantoate + beta-Alanine	AMP + Diphosphate + Pantothenate	CoA	M00119	6.3.2.1	K01918,K13799
R03269	C04352 <=> C01134 + C00011	(R)-4'-Phosphopantothenoyl-L-cysteine	Pantetheine 4'-phosphate + CO2	CoA	M00120	4.1.1.36	K01598,K13038
R03018	C00002 + C00864 <=> C00008 + C03492	ATP + Pantothenate	ADP + D-4'-Phosphopantothenate	CoA	M00120	2.7.1.33	K00867,K01947,K03525,K09680
R00130	C00002 + C00882 <=> C00008 + C00010	ATP + Dephospho-CoA	ADP + CoA	CoA	M00120	2.7.1.24	K00859,K02318
R00489	C00049 <=> C00099 + C00011	L-Aspartate	beta-Alanine + CO2	CoA	M00119	4.1.1.11,4.1.1.15	K01579,K01580,K18933,K18966
R01214_2	C00183 + C00026 <=> C00141 + C00025	L-Valine + 2-Oxoglutarate	3-Methyl-2-oxobutanoic acid + L-Glutamate	CoA	M00119	-	-
R01226	C00143 + C00141 + C00001 <=> C00101 + C00966	5,10-Methylenetetrahydrofolate + 3-Methyl-2-oxobutanoic acid + H2O	Tetrahydrofolate + 2-Dehydropantoate	CoA	M00119	2.1.2.11	K00606
R03035	C00002 + C01134 <=> C00013 + C00882	ATP + Pantetheine 4'-phosphate	Diphosphate + Dephospho-CoA	CoA	M00120	2.7.7.3	K00954,K02201,K02318
R02472	C00966 + C00005 + C00080 <=> C00522 + C00006	2-Dehydropantoate + NADPH + H+	(R)-Pantoate + NADP+	CoA	M00119	1.1.1.169	K00077
R04439	C06010 + C00005 + C00080 <=> C04272 + C00006	(S)-2-Acetolactate + NADPH + H+	(R)-2,3-Dihydroxy-3-methylbutanoate + NADP+	CoA	added manually	1.1.1.86,1.1.1.383	K00053
R08331	C00322 + C00024 + C00001 <=> C16583 + C00010	2-Oxoadipate + Acetyl-CoA + H2O	(R)-(Homo)2-citrate + CoA	CoB	M00608	2.3.3.-	K10977
R08332	C16588 + C00024 + C00001 <=> C16598 + C00010	2-Oxopimelate + Acetyl-CoA + H2O	(R)-(Homo)3-citrate + CoA	CoB	M00608	2.3.3.-	K10977
R08217	C16594 + C00002 <=> C04628 + C00008	7-Mercaptoheptanoylthreonine + ATP	Coenzyme B + ADP	CoB	added manually	2.7.1.-	-
R08323	C16593 + C00188 + C00002 <=> C16594 + C00008 + C00009	7-Mercaptoheptanoic acid + L-Threonine + ATP	7-Mercaptoheptanoylthreonine + ADP + Orthophosphate	CoB	added manually	-	-
R08214	C16597 + C00003 <=> C16588 + C00011 + C00004 + C00080	(-)-threo-Iso(homo)2-citrate + NAD+	2-Oxopimelate + CO2 + NADH + H+	CoB	M00608	1.1.1.-	K10978
R08215	C16600 + C00003 <=> C16589 + C00011 + C00004 + C00080	(-)-threo-Iso(homo)3-citrate + NAD+	2-Oxosuberate + CO2 + NADH + H+	CoB	M00608	1.1.1.-	K10978
R08328	C16589 <=> C16590 + C00011	2-Oxosuberate	7-Oxoheptanoic acid + CO2	CoB	added manually	-	-
R10392	C16583 <=> C20581 + C00001	(R)-(Homo)2-citrate	cis-(Homo)2-aconitate + H2O	CoB	M00608	4.2.1.114	K16792,K16793
R10395	C16598 <=> C20582 + C00001	(R)-(Homo)3-citrate	cis-(Homo)3-aconitate + H2O	CoB	M00608	4.2.1.114	K16792,K16793
R10393	C20581 + C00001 <=> C16597	cis-(Homo)2-aconitate + H2O	(-)-threo-Iso(homo)2-citrate	CoB	M00608	4.2.1.114	K16792,K16793
R10396	C20582 + C00001 <=> C16600	cis-(Homo)3-aconitate + H2O	(-)-threo-Iso(homo)3-citrate	CoB	M00608	4.2.1.114	K16792,K16793
R10397	C16590 <=> C16593	7-Oxoheptanoic acid	7-Mercaptoheptanoic acid	CoB	added manually	-	-
R04148	C01185 + C03114 <=> C00253 + C04778 + C00080	Nicotinate D-ribonucleotide + Dimethylbenzimidazole	Nicotinate + N1-(5-Phospho-alpha-D-ribosyl)-5,6-dimethylbenzimidazole + H+	Cobalamin	M00122	2.4.2.21	K00768
R04594	C04778 + C00001 <=> C05775 + C00009	N1-(5-Phospho-alpha-D-ribosyl)-5,6-dimethylbenzimidazole + H2O	alpha-Ribazole + Orthophosphate	Cobalamin	M00122	3.1.3.73	K02226,K22316
R05705	C00061 + C00004 + C00080 <=> C01847 + C00003	FMN + NADH + H+	Reduced FMN + NAD+	Cobalamin	added manually	1.5.1.36,1.5.1.39,1.5.1.41,1.5.1.42	K00484,K05368,K13562,K14631,K19286,K20146,K22393,K22394,K23462,K23470
R05706	C00061 + C00005 + C00080 <=> C01847 + C00006	FMN + NADPH + H+	Reduced FMN + NADP+	Cobalamin	added manually	1.5.1.38,1.5.1.39,1.5.1.-	K00299,K13562,K19285,K19286
R05807	C05778 + C00175 <=> C11538 + 2 C00080	Sirohydrochlorin + Cobalt ion	Cobalt-sirohydrochlorin + 2 H+	Cobalamin	added manually	4.99.1.3	K02190,K03795,K22011
R11580	C00019 + C17401 + C00030 <=> C00021 + C11540 + C00028	S-Adenosyl-L-methionine + Cobalt-factor III + Reduced acceptor	S-Adenosyl-L-homocysteine + Cobalt-precorrin 4 + Acceptor	Cobalamin	added manually	2.1.1.272	K21479
R08716	C17401 <=> C11539	Cobalt-factor III	Cobalt-precorrin 3	Cobalamin	added manually	-	-
R05218	2 C06504 + C01847 <=> 2 C06505 + C00061 + 2 C00080	2 Cob(II)yrinate a,c diamide + Reduced FMN	2 Cob(I)yrinate a,c diamide + FMN + 2 H+	Cobalamin	added manually	1.16.8.1	K13786
R05220	C06505 + C00002 <=> C06506 + C00536	Cob(I)yrinate a,c diamide + ATP	Adenosyl cobyrinate a,c diamide + Triphosphate	Cobalamin	M00122	2.5.1.17	K00798,K19221
R05808	C11538 + C00019 <=> C17401 + C00021	Cobalt-sirohydrochlorin + S-Adenosyl-L-methionine	Cobalt-factor III + S-Adenosyl-L-homocysteine	Cobalamin	added manually	2.1.1.151	K03394,K13540
R05809	C11539 + C00019 <=> C11540 + C00021	Cobalt-precorrin 3 + S-Adenosyl-L-methionine	Cobalt-precorrin 4 + S-Adenosyl-L-homocysteine	Cobalamin	added manually	2.1.1.131	K05934,K13540,K13541
R05810	C11540 + C00019 <=> C16242 + C00021	Cobalt-precorrin 4 + S-Adenosyl-L-methionine	Cobalt-precorrin 5A + S-Adenosyl-L-homocysteine	Cobalamin	added manually	2.1.1.271	K05936
R07772	C16242 + C00001 <=> C16243 + C00084	Cobalt-precorrin 5A + H2O	Cobalt-precorrin 5B + Acetaldehyde	Cobalamin	added manually	3.7.1.12	K02189,K13541
R07773	C16243 + C00019 <=> C11542 + C00021	Cobalt-precorrin 5B + S-Adenosyl-L-methionine	Cobalt-precorrin 6 + S-Adenosyl-L-homocysteine	Cobalamin	added manually	2.1.1.195	K02188
R05812	C11542 + C00004 + C00080 <=> C11543 + C00003	Cobalt-precorrin 6 + NADH + H+	Cobalt-dihydro-precorrin 6 + NAD+	Cobalamin	added manually	1.3.1.106	K05895
R07774	C11543 + C00019 <=> C16244 + C00021 + C00011	Cobalt-dihydro-precorrin 6 + S-Adenosyl-L-methionine	Cobalt-precorrin 7 + S-Adenosyl-L-homocysteine + CO2	Cobalamin	added manually	2.1.1.196	K02191
R07775	C16244 + C00019 <=> C11545 + C00021	Cobalt-precorrin 7 + S-Adenosyl-L-methionine	Cobalt-precorrin 8 + S-Adenosyl-L-homocysteine	Cobalamin	added manually	2.1.1.289	K03399
R05814	C11545 <=> C05773	Cobalt-precorrin 8	Cobyrinate	Cobalamin	added manually	5.4.99.60	K06042
R05815	C05773 + 2 C00064 + 2 C00002 + 2 C00001 <=> C06504 + 2 C00025 + 2 C00008 + 2 C00009	Cobyrinate + 2 L-Glutamine + 2 ATP + 2 H2O	Cob(II)yrinate a,c diamide + 2 L-Glutamate + 2 ADP + 2 Orthophosphate	Cobalamin	added manually	6.3.5.11	K02224
R05225	C06506 + 4 C00064 + 4 C00002 + 4 C00001 <=> C06507 + 4 C00025 + 4 C00009 + 4 C00008	Adenosyl cobyrinate a,c diamide + 4 L-Glutamine + 4 ATP + 4 H2O	Adenosyl cobyrinate hexaamide + 4 L-Glutamate + 4 Orthophosphate + 4 ADP	Cobalamin	M00122	6.3.5.10	K02232
R07302	C00002 + C06507 + C03194 <=> C00008 + C00009 + C06508	ATP + Adenosyl cobyrinate hexaamide + (R)-1-Aminopropan-2-ol	ADP + Orthophosphate + Adenosyl cobinamide	Cobalamin	M00122	6.3.1.10	K02225,K02227
R06558	C06508 + C00044 <=> C06509 + C00035	Adenosyl cobinamide + GTP	Adenosyl cobinamide phosphate + GDP	Cobalamin	M00122	2.7.1.156	K02231
R05221	C06508 + C00002 <=> C06509 + C00008	Adenosyl cobinamide + ATP	Adenosyl cobinamide phosphate + ADP	Cobalamin	M00122	2.7.1.156	K02231
R05222	C06509 + C00044 <=> C06510 + C00013	Adenosyl cobinamide phosphate + GTP	Adenosine-GDP-cobinamide + Diphosphate	Cobalamin	M00122	2.7.7.62	K02231,K19712
R05223	C06510 + C05775 <=> C00194 + C00144	Adenosine-GDP-cobinamide + alpha-Ribazole	Cobamide coenzyme	Cobalamin	M00122	2.7.8.26	K02233
R05789	C11536 + C00001 <=> C11537 + C00009	(2R)-O-Phospho-3-sulfolactate + H2O	(2R)-3-Sulfolactate + Orthophosphate	CoM	M00358	3.1.3.71	K05979
R07136	C11537 + C00003 <=> C05528 + C00004 + C00080	(2R)-3-Sulfolactate + NAD+	3-Sulfopyruvate + NADH + H+	CoM	M00358	1.1.1.37,1.1.1.337	K00024,K00025,K00026,K05884
R05774	C05528 <=> C00593 + C00011	3-Sulfopyruvate	Sulfoacetaldehyde + CO2	CoM	M00358	4.1.1.79	K06034,K13039
R09153	C00593 <=> C03576	Sulfoacetaldehyde	Coenzyme M	CoM	M00358	-	-
R07476	C00094 + C00074 <=> C11536	Sulfite + Phosphoenolpyruvate	(2R)-O-Phospho-3-sulfolactate	CoM	M00358	4.4.1.19	K08097
R00573	C00002 + C00075 + C00064 + C00001 <=> C00008 + C00009 + C00063 + C00025	ATP + UTP + L-Glutamine + H2O	ADP + Orthophosphate + CTP + L-Glutamate	Pyrimidine	M00052	6.3.4.2	K01937
R00571	C00002 + C00075 + C00014 <=> C00008 + C00009 + C00063	ATP + UTP + Ammonia	ADP + Orthophosphate + CTP	Pyrimidine	M00052	6.3.4.2	K01937
R10305	C00979 + C00155 <=> C02291 + C00033	O-Acetyl-L-serine + L-Homocysteine	L-Cystathionine + Acetate	Cysteine	M00609	2.5.1.134	K17216
R00897	C00979 + C00283 <=> C00097 + C00033	O-Acetyl-L-serine + Hydrogen sulfide	L-Cysteine + Acetate	Cysteine	M00021	2.5.1.47,2.5.1.65	K01738,K10150,K13034,K17069
R00194	C00021 + C00001 <=> C03539 + C00147	S-Adenosyl-L-homocysteine + H2O	S-Ribosyl-L-homocysteine + Adenine	Cysteine	M00609	3.2.2.9	K01243,K18284
R01001	C02291 + C00001 <=> C00097 + C00014 + C00109	L-Cystathionine + H2O	L-Cysteine + Ammonia + 2-Oxobutanoate	Cysteine	M00338	4.4.1.1	K01758,K17217
R12342	C00008 + C00065 <=> C00020 + C01005	ADP + L-Serine	AMP + O-Phospho-L-serine	Cysteine	added manually	2.7.1.226	K23370
R01291	C03539 <=> C11838 + C00155	S-Ribosyl-L-homocysteine	(S)-4,5-Dihydroxypentane-2,3-dione + L-Homocysteine	Cysteine	M00609	4.4.1.21	K07173
R07274	C01005 + C00283 <=> C00097 + C00009	O-Phospho-L-serine + Hydrogen sulfide	L-Cysteine + Orthophosphate	Cysteine	added manually	2.5.1.47,2.5.1.65	K01738,K10150
R00586	C00065 + C00024 <=> C00979 + C00010	L-Serine + Acetyl-CoA	O-Acetyl-L-serine + CoA	Cysteine	M00021	2.3.1.30	K00640,K19726,K23304
R01290	C00065 + C00155 <=> C02291 + C00001	L-Serine + L-Homocysteine	L-Cystathionine + H2O	Cysteine	M00338	4.2.1.22	K01697,K10150
R00177	C00002 + C00073 + C00001 <=> C00009 + C00013 + C00019	ATP + L-Methionine + H2O	Orthophosphate + Diphosphate + S-Adenosyl-L-methionine	Cysteine,SAM	M00609	2.5.1.6	K00789
R11634	C00002 + C00058 <=> C00131 + C00011 + C00001	ATP + Formate	dATP + CO2 + H2O	Purine	added manually	1.1.98.6	K21636
R11633	C00044 + C00058 <=> C00286 + C00011 + C00001	GTP + Formate	dGTP + CO2 + H2O	Purine	added manually	1.1.98.6	K21636
R11636	C00063 + C00058 <=> C00458 + C00011 + C00001	CTP + Formate	dCTP + CO2 + H2O	Pyrimidine	M00053	1.1.98.6	K21636
R02100	C00460 + C00001 <=> C00365 + C00013	dUTP + H2O	dUMP + Diphosphate	Pyrimidine	M00053	3.6.1.23,3.6.1.-	K01519,K01520,K02428
R02325	C00458 + C00001 <=> C00460 + C00014	dCTP + H2O	dUTP + Ammonia	Pyrimidine	M00053	3.5.4.13	K01494
R02101	C00365 + C00143 <=> C00415 + C00364	dUMP + 5,10-Methylenetetrahydrofolate	Dihydrofolate + dTMP	Pyrimidine	M00053	2.1.1.45	K00560,K13998
R02094	C00002 + C00364 <=> C00008 + C00363	ATP + dTMP	ADP + dTDP	Pyrimidine	M00053	2.7.4.9,2.7.4.12	K00943
R02093	C00002 + C00363 <=> C00008 + C00459	ATP + dTDP	ADP + dTTP	Pyrimidine	M00053	2.7.4.6	K00940,K18533
R09399	C19153 + C00044 + C00025 <=> C19152 + C00035 + C00009	Coenzyme F420-0 + GTP + L-Glutamate	Coenzyme F420-1 + GDP + Orthophosphate	F420	M00378	6.3.2.31	K12234
R09400	C19152 + C00044 + C00025 <=> C00876 + C00035 + C00009	Coenzyme F420-1 + GTP + L-Glutamate	Coenzyme F420 + GDP + Orthophosphate	F420	M00378	6.3.2.34	K12234
R09397	C19156 + C00044 <=> C19155 + C00013	(2S)-2-Phospholactate + GTP	(2S)-Lactyl-2-diphospho-5'-guanosine + Diphosphate	F420	M00378	2.7.7.68	K14941
R12161	C04732 + C00082 + C00019 <=> C21971 + C15809 + C00073 + C05198	5-Amino-6-(1-D-ribitylamino)uracil + L-Tyrosine + S-Adenosyl-L-methionine	5-Amino-5-(4-hydroxybenzyl)-6-(D-ribitylimino)-5,6-dihydrouracil + Iminoglycine + L-Methionine + 5'-Deoxyadenosine	F420	M00378	2.5.1.147	K11779,K11781
R12162	C21971 + C00019 <=> C19154 + C00014 + C00073 + C05198	5-Amino-5-(4-hydroxybenzyl)-6-(D-ribitylimino)-5,6-dihydrouracil + S-Adenosyl-L-methionine	7,8-Didemethyl-8-hydroxy-5-deazariboflavin + Ammonia + L-Methionine + 5'-Deoxyadenosine	F420	M00378	4.3.1.32	K11779,K11780
R09398	C19154 + C19155 <=> C19153 + C00144	7,8-Didemethyl-8-hydroxy-5-deazariboflavin + (2S)-Lactyl-2-diphospho-5'-guanosine	Coenzyme F420-0 + GMP	F420	M00378	2.7.8.28	K11212
R00084	4 C00931 + C00001 <=> C01024 + 4 C00014	4 Porphobilinogen + H2O	Hydroxymethylbilane + 4 Ammonia	F430	M00846	2.5.1.61	K01749
R00036	2 C00430 <=> C00931 + 2 C00001	2 5-Aminolevulinate	Porphobilinogen + 2 H2O	F430	M00846	4.2.1.24	K01698
R02272	C03741 <=> C00430	(S)-4-Amino-5-oxopentanoate	5-Aminolevulinate	F430	M00846	5.4.3.8	K01845
R11626	C05778 + C19609 <=> C21510 + 2 C00080	Sirohydrochlorin + Nickel(2+)	Nickel-sirohydrochlorin + 2 H+	F430	M00836	4.99.1.11	K22011
R11627	C21510 + 2 C00002 + 2 C00064 + 2 C00001 <=> C21511 + 2 C00008 + 2 C00025 + 2 C00009	Nickel-sirohydrochlorin + 2 ATP + 2 L-Glutamine + 2 H2O	Nickel-sirohydrochlorin a,c-diamide + 2 ADP + 2 L-Glutamate + 2 Orthophosphate	F430	M00836	6.3.5.12	K22012
R11628	C00002 + C21511 + 3 C00030 + C00001 <=> C00008 + C00009 + C21512 + 3 C00028	ATP + Nickel-sirohydrochlorin a,c-diamide + 3 Reduced acceptor + H2O	ADP + Orthophosphate + 15,17(3)-Seco-F430-17(3)-acid + 3 Acceptor	F430	M00836	6.3.3.7	K21610,K21611
R11629	C21512 + C00002 <=> C05777 + C00008 + C00009	15,17(3)-Seco-F430-17(3)-acid + ATP	Coenzyme F430 + ADP + Orthophosphate	F430	M00836	6.4.1.9	K21612
R05578	C01641 + C00025 + C00002 <=> C02987 + C00013 + C00020	tRNA(Glu) + L-Glutamate + ATP	L-Glutamyl-tRNA(Glu) + Diphosphate + AMP	F430	M00846	6.1.1.17,6.1.1.24	K01885,K09698,K14163
R04109	C02987 + C00005 + C00080 <=> C03741 + C01641 + C00006	L-Glutamyl-tRNA(Glu) + NADPH + H+	(S)-4-Amino-5-oxopentanoate + tRNA(Glu) + NADP+	F430	M00846	1.2.1.70	K02492
R03165	C01024 <=> C01051 + C00001	Hydroxymethylbilane	Uroporphyrinogen III + H2O	F430	M00846	4.2.1.75	K01719,K13542,K13543
R03194	2 C00019 + C01051 <=> 2 C00021 + C02463	2 S-Adenosyl-L-methionine + Uroporphyrinogen III	2 S-Adenosyl-L-homocysteine + Precorrin 2	F430	M00846	2.1.1.107	K00589,K02302,K02303,K02496,K13542,K13543
R03947	C02463 + C00003 <=> C05778 + C00004 + C00080	Precorrin 2 + NAD+	Sirohydrochlorin + NADH + H+	F430	M00846	1.3.1.76	K02302,K02304
R07281	C00199 <=> C15556 + C00058	D-Ribulose 5-phosphate	L-3,4-Dihydroxybutan-2-one 4-phosphate + Formate	Flavin,FMN	M00125	4.1.99.12	K02858,K14652
R04457	C04732 + C15556 <=> C04332 + 2 C00001 + C00009	5-Amino-6-(1-D-ribitylamino)uracil + L-3,4-Dihydroxybutan-2-one 4-phosphate	6,7-Dimethyl-8-(D-ribityl)lumazine + 2 H2O + Orthophosphate	Flavin,FMN	M00125	2.5.1.78	K00794
R00549	C00002 + C00255 <=> C00008 + C00061	ATP + Riboflavin	ADP + FMN	Flavin,FMN	M00125	2.7.1.26	K00861,K11753,K20884
R00066	2 C04332 <=> C00255 + C04732	2 6,7-Dimethyl-8-(D-ribityl)lumazine	Riboflavin + 5-Amino-6-(1-D-ribitylamino)uracil	Flavin,FMN	M00125	2.5.1.9	K00793
R07280	C04454 + C00001 <=> C04732 + C00009	5-Amino-6-(5'-phospho-D-ribitylamino)uracil + H2O	5-Amino-6-(1-D-ribitylamino)uracil + Orthophosphate	Flavin,FMN	M00125	3.1.3.104	K20860,K20861,K20862,K21063,K21064,K22912
R00161	C00002 + C00061 <=> C00013 + C00016	ATP + FMN	Diphosphate + FAD	Flavin,FAD	M00125	2.7.7.2	K00953,K11753,K14656,K22949
R03458	C01268 + C00005 + C00080 <=> C04454 + C00006	5-Amino-6-(5'-phosphoribosylamino)uracil + NADPH + H+	5-Amino-6-(5'-phospho-D-ribitylamino)uracil + NADP+	Flavin,FMN	M00125	1.1.1.193	K00082,K11752
R03459	C01304 + C00001 <=> C01268 + C00014	2,5-Diamino-6-(5-phospho-D-ribosylamino)pyrimidin-4(3H)-one + H2O	5-Amino-6-(5'-phosphoribosylamino)uracil + Ammonia	Flavin,FMN	M00125	3.5.4.26	K01498,K11752
R00947	C00103 + C00001 <=> C00267 + C00009	D-Glucose 1-phosphate + H2O	alpha-D-Glucose + Orthophosphate	Gluconeogenesis	added manually	3.1.3.10	K01085,K20866
R01788	C00668 + C00001 <=> C00267 + C00009	alpha-D-Glucose 6-phosphate + H2O	alpha-D-Glucose + Orthophosphate	Gluconeogenesis	added manually	3.1.3.9	K01084
R01070	C00111 + C00118 <=> C05378	Glycerone phosphate + D-Glyceraldehyde 3-phosphate	beta-D-Fructose 1,6-bisphosphate	Gluconeogenesis	M00003	4.1.2.13	K01622,K01623,K01624,K11645,K16305,K16306
R04780	C05378 + C00001 <=> C05345 + C00009	beta-D-Fructose 1,6-bisphosphate + H2O	beta-D-Fructose 6-phosphate + Orthophosphate	Gluconeogenesis	M00003	3.1.3.11	K01086,K01622,K02446,K03841,K04041,K11532
R00341	C00002 + C00036 <=> C00008 + C00074 + C00011	ATP + Oxaloacetate	ADP + Phosphoenolpyruvate + CO2	Gluconeogenesis	M00003	4.1.1.49	K01610
R01518	C00631 <=> C00197	2-Phospho-D-glycerate	3-Phospho-D-glycerate	Gluconeogenesis	M00003	5.4.2.11,5.4.2.12	K01834,K01837,K15633,K15634,K15635
R01015	C00118 <=> C00111	D-Glyceraldehyde 3-phosphate	Glycerone phosphate	Gluconeogenesis	M00003	5.3.1.1	K01803
R00431	C00044 + C00036 <=> C00035 + C00074 + C00011	GTP + Oxaloacetate	GDP + Phosphoenolpyruvate + CO2	Gluconeogenesis	M00003	4.1.1.32	K01596
R00658	C00074 + C00001 <=> C00631	Phosphoenolpyruvate + H2O	2-Phospho-D-glycerate	Gluconeogenesis	M00003	4.2.1.11	K01689
R00959	C00668 <=> C00103	alpha-D-Glucose 6-phosphate	D-Glucose 1-phosphate	Gluconeogenesis	added manually	5.4.2.2,5.4.2.5	K01835,K15778,K15779
R01512	C00002 + C00197 <=> C00008 + C00236	ATP + 3-Phospho-D-glycerate	ADP + 3-Phospho-D-glyceroyl phosphate	Gluconeogenesis	M00003	2.7.2.3	K00927
R01061	C00236 + C00004 + C00080 <=> C00118 + C00009 + C00003	3-Phospho-D-glyceroyl phosphate + NADH + H+	D-Glyceraldehyde 3-phosphate + Orthophosphate + NAD+	Gluconeogenesis	M00003	1.2.1.12,1.2.1.59	K00134,K00150,K10705
R01063	C00236 + C00005 + C00080 <=> C00118 + C00009 + C00006	3-Phospho-D-glyceroyl phosphate + NADPH + H+	D-Glyceraldehyde 3-phosphate + Orthophosphate + NADP+	Gluconeogenesis	M00003	1.2.1.13,1.2.1.59	K00150,K05298
R01602	C00267 <=> C00221	alpha-D-Glucose	beta-D-Glucose	Gluconeogenesis	added manually	5.1.3.3	K01785
R00243	C00026 + C00014 + C00004 + C00080 <=> C00025 + C00003 + C00001	2-Oxoglutarate + Ammonia + NADH + H+	L-Glutamate + NAD+ + H2O	Glutamate	added manually	1.4.1.2,1.4.1.3,1.4.1.14	K00260,K00261,K15371
R00248	C00026 + C00014 + C00005 + C00080 <=> C00025 + C00006 + C00001	2-Oxoglutarate + Ammonia + NADPH + H+	L-Glutamate + NADP+ + H2O	Glutamate	added manually	1.4.1.3,1.4.1.4,1.4.1.13	K00261,K00262,K00265,K00266
R00253	C00002 + C00025 + C00014 <=> C00008 + C00009 + C00064	ATP + L-Glutamate + Ammonia	ADP + Orthophosphate + L-Glutamine	Glutamine	added manually	6.3.1.2	K01915
R01465	C00188 + C00003 <=> C03508 + C00004 + C00080	L-Threonine + NAD+	L-2-Amino-3-oxobutanoic acid + NADH + H+	Glycine	added manually	1.1.1.103	K00060,K15789
R00751	C00188 <=> C00037 + C00084	L-Threonine	Glycine + Acetaldehyde	Glycine	added manually	4.1.2.5,4.1.2.48	K01620
R00372	C00048 + C00025 <=> C00037 + C00026	Glyoxylate + L-Glutamate	Glycine + 2-Oxoglutarate	Glycine	added manually	2.6.1.4,2.6.1.44	K00827,K00830,K14272
R03758	C03508 <=> C01888 + C00011	L-2-Amino-3-oxobutanoic acid	Aminoacetone + CO2	Glycine	added manually	1.1.1.381	K16066
R00945	C00101 + C00065 <=> C00143 + C00037 + C00001	Tetrahydrofolate + L-Serine	5,10-Methylenetetrahydrofolate + Glycine + H2O	Glycine	added manually	2.1.2.1	K00600
R00371	C00024 + C00037 <=> C00010 + C03508	Acetyl-CoA + Glycine	CoA + L-2-Amino-3-oxobutanoic acid	Glycine	added manually	2.3.1.29	K00639
R03759	C01888 + C00004 + C00080 <=> C03194 + C00003	Aminoacetone + NADH + H+	(R)-1-Aminopropan-2-ol + NAD+	Glycine	added manually	1.1.1.75	-
R01130	C00130 + C00003 + C00001 <=> C00655 + C00004 + C00080	IMP + NAD+ + H2O	Xanthosine 5'-phosphate + NADH + H+	Purine,GTP	M00050	1.1.1.205	K00088
R00330	C00002 + C00035 <=> C00008 + C00044	ATP + GDP	ADP + GTP	Purine,GTP	M00050	2.7.4.6	K00940,K18533
R00430	C00035 + C00074 <=> C00044 + C00022	GDP + Phosphoenolpyruvate	GTP + Pyruvate	Purine,GTP	M00050	2.7.1.40	K00873,K12406
R00332	C00002 + C00144 <=> C00008 + C00035	ATP + GMP	ADP + GDP	Purine,GTP	M00050	2.7.4.8	K00942
R01230	C00002 + C00655 + C00014 <=> C00020 + C00013 + C00144	ATP + Xanthosine 5'-phosphate + Ammonia	AMP + Diphosphate + GMP	Purine,GTP	M00050	6.3.5.2	K01951
R01231	C00002 + C00655 + C00064 + C00001 <=> C00020 + C00013 + C00144 + C00025	ATP + Xanthosine 5'-phosphate + L-Glutamine + H2O	AMP + Diphosphate + GMP + L-Glutamate	Purine,GTP	M00050	6.3.5.2	K01951
R01163	C01929 + C00001 + C00003 <=> C00135 + C00004 + C00080	L-Histidinal + H2O + NAD+	L-Histidine + NADH + H+	Histidine	M00026	1.1.1.23	K00013,K14152
R03013	C01100 + C00001 <=> C00860 + C00009	L-Histidinol phosphate + H2O	L-Histidinol + Orthophosphat	Histidine	M00026	3.1.3.15	K01089,K04486,K05602,K18649
R03457	C04666 <=> C01267 + C00001	D-erythro-1-(Imidazol-4-yl)glycerol 3-phosphate	3-(Imidazol-4-yl)-2-oxopropyl phosphate + H2O	Histidine	M00026	4.2.1.19	K01089,K01693
R04640	C04896 <=> C04916	5-(5-Phospho-D-ribosylaminoformimino)-1-(5-phosphoribosyl)-imidazole-4-carboxamide	N-(5'-Phospho-D-1'-ribulosylformimino)-5-amino-1-(5''-phospho-D-ribosyl)-4-imidazolecarboxamide	Histidine	M00026	5.3.1.16	K01814
R03012	C00860 + C00003 <=> C01929 + C00004 + C00080	L-Histidinol + NAD+	L-Histidinal + NADH + H+	Histidine	M00026	1.1.1.23	K00013,K14152
R03243	C01267 + C00025 <=> C01100 + C00026	3-(Imidazol-4-yl)-2-oxopropyl phosphate + L-Glutamate	L-Histidinol phosphate + 2-Oxoglutarate	Histidine	M00026	2.6.1.9	K00817
R01071	C00002 + C00119 <=> C02739 + C00013	ATP + 5-Phospho-alpha-D-ribose 1-diphosphate	1-(5-Phospho-D-ribosyl)-ATP + Diphosphate	Histidine	M00026	2.4.2.17	K00765,K02502
R04035	C02739 + C00001 <=> C02741 + C00013	1-(5-Phospho-D-ribosyl)-ATP + H2O	Phosphoribosyl-AMP + Diphosphate	Histidine	M00026	3.6.1.31	K01523,K11755,K14152
R04037	C02741 + C00001 <=> C04896	Phosphoribosyl-AMP + H2O	5-(5-Phospho-D-ribosylaminoformimino)-1-(5-phosphoribosyl)-imidazole-4-carboxamide	Histidine	M00026	3.5.4.19	K01496,K11755,K14152
R04558	C04916 + C00064 <=> C04666 + C04677 + C00025	N-(5'-Phospho-D-1'-ribulosylformimino)-5-amino-1-(5''-phospho-D-ribosyl)-4-imidazolecarboxamide + L-Glutamine	D-erythro-1-(Imidazol-4-yl)glycerol 3-phosphate + 1-(5'-Phosphoribosyl)-5-amino-4-imidazolecarboxamide + L-Glutamate	Histidine	M00026	4.3.2.10	K01663,K02500,K02501
R01072	C00064 + C00119 + C00001 <=> C03090 + C00013 + C00025	L-Glutamine + 5-Phospho-alpha-D-ribose 1-diphosphate + H2O	5-Phosphoribosylamine + Diphosphate + L-Glutamate	Purine	M00048	2.4.2.14	K00764
R04591	C00002 + C04751 + C00049 <=> C00008 + C00009 + C04823	ATP + 1-(5-Phospho-D-ribosyl)-5-amino-4-imidazolecarboxylate + L-Aspartate	ADP + Orthophosphate + 1-(5'-Phosphoribosyl)-5-amino-4-(N-succinocarboxamide)-imidazole	Purine	M00048	6.3.2.6	K01587,K01923,K13713
R07404	C00002 + C03373 + C00288 <=> C00008 + C00009 + C15667	ATP + Aminoimidazole ribotide + HCO3-	ADP + Orthophosphate + 5-Carboxyamino-1-(5-phospho-D-ribosyl)imidazole	Purine	M00048	6.3.4.18	K01589
R04144	C00002 + C03090 + C00037 <=> C00008 + C00009 + C03838	ATP + 5-Phosphoribosylamine + Glycine	ADP + Orthophosphate + 5'-Phosphoribosylglycinamide	Purine	M00048	6.3.4.13	K01945,K11787,K11788,K13713
R01127	C04734 <=> C00130 + C00001	1-(5'-Phosphoribosyl)-5-formamido-4-imidazolecarboxamide	IMP + H2O	Purine	M00048	3.5.4.10	K00602,K11176
R04209	C03373 + C00011 <=> C04751	Aminoimidazole ribotide + CO2	1-(5-Phospho-D-ribosyl)-5-amino-4-imidazolecarboxylate	Purine	M00048	4.1.1.21	K01587,K11808
R04325	C00234 + C03838 <=> C00101 + C04376	10-Formyltetrahydrofolate + 5'-Phosphoribosylglycinamide	Tetrahydrofolate + 5'-Phosphoribosyl-N-formylglycinamide	Purine	M00048	2.1.2.2	K00601,K01492,K08289,K11175,K11787
R04559	C04823 <=> C00122 + C04677	1-(5'-Phosphoribosyl)-5-amino-4-(N-succinocarboxamide)-imidazole	Fumarate + 1-(5'-Phosphoribosyl)-5-amino-4-imidazolecarboxamide	Purine	M00048	4.3.2.2	K01756
R06975	C00058 + C00002 + C04677 <=> C00008 + C00009 + C04734	Formate + ATP + 1-(5'-Phosphoribosyl)-5-amino-4-imidazolecarboxamide	ADP + Orthophosphate + 1-(5'-Phosphoribosyl)-5-formamido-4-imidazolecarboxamide	Purine	M00048	6.3.4.23	K06863
R07405	C15667 <=> C04751	5-Carboxyamino-1-(5-phospho-D-ribosyl)imidazole	1-(5-Phospho-D-ribosyl)-5-amino-4-imidazolecarboxylate	Purine	M00048	5.4.99.18	K01588
R04560	C00234 + C04677 <=> C00101 + C04734	10-Formyltetrahydrofolate + 1-(5'-Phosphoribosyl)-5-amino-4-imidazolecarboxamide	Tetrahydrofolate + 1-(5'-Phosphoribosyl)-5-formamido-4-imidazolecarboxamide	Purine	M00048	2.1.2.3	K00602,K01492
R04463	C00002 + C04376 + C00064 + C00001 <=> C00008 + C00009 + C04640 + C00025	ATP + 5'-Phosphoribosyl-N-formylglycinamide + L-Glutamine + H2O	ADP + Orthophosphate + 2-(Formamido)-N1-(5'-phosphoribosyl)acetamidine + L-Glutamate	Purine	M00048	6.3.5.3	K01952,K23264,K23265,K23269,K23270
R04208	C00002 + C04640 <=> C00008 + C00009 + C03373	ATP + 2-(Formamido)-N1-(5'-phosphoribosyl)acetamidine	ADP + Orthophosphate + Aminoimidazole ribotide	Purine	M00048	6.3.3.1	K01933,K11787,K11788
R07399	C00024 + C00022 + C00001 <=> C02612 + C00010	Acetyl-CoA + Pyruvate + H2O	(R)-2-Methylmalate + CoA	Isoleucine	M00535	2.3.1.182	K09011
R00996	C00188 <=> C00109 + C00014	L-Threonine	2-Oxobutanoate + Ammonia	Isoleucine	M00570	4.3.1.19	K01754,K17989
R05070	C06007 <=> C00671 + C00001	(R)-2,3-Dihydroxy-3-methylpentanoate	(S)-3-Methyl-2-oxopentanoic acid + H2O	Isoleucine	M00570	4.2.1.9	K01687
R00994	C06032 + C00003 <=> C00109 + C00011 + C00004 + C00080	D-erythro-3-Methylmalate + NAD+	2-Oxobutanoate + CO2 + NADH + H+	Isoleucine	M00535	1.1.1.85	K00052
R05069	C06006 <=> C14463	(S)-2-Aceto-2-hydroxybutanoate	(R)-3-Hydroxy-3-methyl-2-oxopentanoate	Isoleucine	M00570	1.1.1.86,5.4.99.3	K00053
R08648	C00022 + C00109 <=> C06006 + C00011	Pyruvate + 2-Oxobutanoate	(S)-2-Aceto-2-hydroxybutanoate + CO2	Isoleucine	M00570	2.2.1.6	K01652,K01653,K11258
R02199	C00671 + C00025 <=> C00407 + C00026	(S)-3-Methyl-2-oxopentanoic acid + L-Glutamate	L-Isoleucine + 2-Oxoglutarate	Isoleucine	M00570	2.6.1.42	K00826
R03898	C02226 + C00001 <=> C06032	2-Methylmaleate + H2O	D-erythro-3-Methylmalate	Isoleucine	M00535	4.2.1.35	K01703,K01704
R03896	C02612 <=> C02226 + C00001	(R)-2-Methylmalate	2-Methylmaleate + H2O	Isoleucine	M00535	4.2.1.35	K01703,K01704
R05068	C14463 + C00005 + C00080 <=> C06007 + C00006	(R)-3-Hydroxy-3-methyl-2-oxopentanoate + NADPH + H+	(R)-2,3-Dihydroxy-3-methylpentanoate + NADP+	Isoleucine	M00570	1.1.1.86	K00053
R01213	C00024 + C00141 + C00001 <=> C02504 + C00010	Acetyl-CoA + 3-Methyl-2-oxobutanoic acid + H2O	alpha-Isopropylmalate + CoA	Leucine	M00432	2.3.3.13	K01649
R04426	C04411 + C00003 <=> C04236 + C00004 + C00080	(2R,3S)-3-Isopropylmalate + NAD+	(2S)-2-Isopropyl-3-oxosuccinate + NADH + H+	Leucine	M00432	1.1.1.85	K00052,K21360
R01652	C04236 <=> C00233 + C00011	(2S)-2-Isopropyl-3-oxosuccinate	4-Methyl-2-oxopentanoate + CO2	Leucine	M00432	1.1.1.85	K00052,K21360
R03968	C02504 <=> C02631 + C00001	alpha-Isopropylmalate	2-Isopropylmaleate + H2O	Leucine	M00432	4.2.1.33	K01702,K01703,K01704,K21359
R01090	C00233 + C00025 <=> C00123 + C00026	4-Methyl-2-oxopentanoate + L-Glutamate	L-Leucine + 2-Oxoglutarate	Leucine	added manually	2.6.1.6,2.6.1.42,2.6.1.67	K00826
R04001	C02631 + C00001 <=> C04411	2-Isopropylmaleate + H2O	(2R,3S)-3-Isopropylmalate	Leucine	M00432	4.2.1.33	K01702,K01703,K01704,K21359
R01088	C00233 + C00014 + C00004 + C00080 <=> C00123 + C00001 + C00003	4-Methyl-2-oxopentanoate + Ammonia + NADH + H+	L-Leucine + H2O + NAD+	Leucine	added manually	1.4.1.9	K00263
R10147	C00441 + C00022 <=> C20258 + C00001	L-Aspartate 4-semialdehyde + Pyruvate	(2S,4S)-4-Hydroxy-2,3,4,5-tetrahydrodipicolinate + H2O	Lysine	M00016,M00525,M00526,M00527	4.3.3.7	K01714
R00271	C00024 + C00001 + C00026 <=> C01251 + C00010	Acetyl-CoA + H2O + 2-Oxoglutarate	(R)-2-Hydroxybutane-1,2,4-tricarboxylate + CoA	Lysine	M00030,M00433	2.3.3.14	K01655,K02594,K10977
R02733	C04390 + C00001 <=> C00033 + C00666	N6-Acetyl-LL-2,6-diaminoheptanedioate + H2O	Acetate + LL-2,6-Diaminoheptanedioate	Lysine	M00525	3.5.1.47	K05823
R02734	C04421 + C00001 <=> C00042 + C00666	N-Succinyl-LL-2,6-diaminoheptanedioate + H2O	Succinate + LL-2,6-Diaminoheptanedioate	Lysine	M00016	3.5.1.18	K01439
R04198	C20258 + C00004 + C00080 <=> C03972 + C00003 + C00001	(2S,4S)-4-Hydroxy-2,3,4,5-tetrahydrodipicolinate + NADH + H+	2,3,4,5-Tetrahydrodipicolinate + NAD+ + H2O	Lysine	M00016,M00525,M00526,M00527	1.17.1.8	K00215
R01934	C05662 + C00003 <=> C00322 + C00011 + C00004 + C00080	Homoisocitrate + NAD+	2-Oxoadipate + CO2 + NADH + H+	Lysine	M00030,M00433	1.1.1.87,1.1.1.286	K05824,K10978,K17753
R00715	C00449 + C00003 + C00001 <=> C00047 + C00026 + C00004 + C00080	N6-(L-1,3-Dicarboxypropyl)-L-lysine + NAD+ + H2O	L-Lysine + 2-Oxoglutarate + NADH + H+	Lysine	M00030	1.5.1.7	K00290
R04199	C20258 + C00005 + C00080 <=> C03972 + C00006 + C00001	(2S,4S)-4-Hydroxy-2,3,4,5-tetrahydrodipicolinate + NADPH + H+	2,3,4,5-Tetrahydrodipicolinate + NADP+ + H2O	Lysine	M00016,M00525,M00526,M00527	1.17.1.8	K00215
R00451	C00680 <=> C00047 + C00011	meso-2,6-Diaminoheptanedioate	L-Lysine + CO2	Lysine	M00016,M00525,M00526,M00527	4.1.1.20	K01586,K12526
R02735	C00666 <=> C00680	LL-2,6-Diaminoheptanedioate	meso-2,6-Diaminoheptanedioate	Lysine	M00016,M00525,M00527	5.1.1.7	K01778
R04475	C04462 + C00025 <=> C04421 + C00026	N-Succinyl-2-L-amino-6-oxoheptanedioate + L-Glutamate	N-Succinyl-LL-2,6-diaminoheptanedioate + 2-Oxoglutarate	Lysine	M00016	2.6.1.17	K00821,K14267
R01939	C00322 + C00025 <=> C00956 + C00026	2-Oxoadipate + L-Glutamate	L-2-Aminoadipate + 2-Oxoglutarate	Lysine	M00030	2.6.1.39	K00825,K00838,K05825
R03444	C01251 <=> C04002 + C00001	(R)-2-Hydroxybutane-1,2,4-tricarboxylate	(Z)-But-1-ene-1,2,4-tricarboxylate + H2O	Lysine	M00030,M00433	4.2.1.114,4.2.1.-	K16792,K16793,K17450
R04371	C04002 + C00001 <=> C05662	(Z)-But-1-ene-1,2,4-tricarboxylate + H2O	Homoisocitrate	Lysine	M00030,M00433	4.2.1.36,4.2.1.114	K01705,K16792,K16793
R04467	C05539 + C00025 <=> C04390 + C00026	N-Acetyl-L-2-amino-6-oxopimelate + L-Glutamate	N6-Acetyl-LL-2,6-diaminoheptanedioate + 2-Oxoglutarate	Lysine	M00525	2.6.1.-	K00841
R02315	C00025 + C04076 + C00005 + C00080 <=> C00449 + C00006 + C00001	L-Glutamate + L-2-Aminoadipate 6-semialdehyde + NADPH + H+	N6-(L-1,3-Dicarboxypropyl)-L-lysine + NADP+ + H2O	Lysine	M00030	1.5.1.10	K00293
R04364	C03972 + C00024 + C00001 <=> C05539 + C00010	2,3,4,5-Tetrahydrodipicolinate + Acetyl-CoA + H2O	N-Acetyl-L-2-amino-6-oxopimelate + CoA	Lysine	M00525	2.3.1.89,2.3.1.-	K05822,K19107
R04365	C00091 + C03972 + C00001 <=> C00010 + C04462	Succinyl-CoA + 2,3,4,5-Tetrahydrodipicolinate + H2O	CoA + N-Succinyl-2-L-amino-6-oxoheptanedioate	Lysine	M00016	2.3.1.117	K00674
R02755	C03871 + C00014 + C00005 + C00080 <=> C00680 + C00006 + C00001	L-2-Amino-6-oxoheptanedioate + Ammonia + NADPH + H+	meso-2,6-Diaminoheptanedioate + NADP+ + H2O	Lysine	M00526	1.4.1.16	K03340
R04336	C03972 + C00001 <=> C03871	2,3,4,5-Tetrahydrodipicolinate + H2O	L-2-Amino-6-oxoheptanedioate	Lysine	M00526	-	-
R07613	C03972 + C00025 + C00001 <=> C00666 + C00026	2,3,4,5-Tetrahydrodipicolinate + L-Glutamate + H2O	LL-2,6-Diaminoheptanedioate + 2-Oxoglutarate	Lysine	M00527	2.6.1.83	K10206
R04863	C05560 + C11482 <=> C05535 + C00020	L-2-Aminoadipate adenylate + Holo-Lys2	alpha-Aminoadipoyl-S-acyl enzyme + AMP	Lysine	M00030	1.2.1.95	K00143
R04390	C05535 + C00005 + C00080 <=> C04076 + C11482 + C00006	alpha-Aminoadipoyl-S-acyl enzyme + NADPH + H+	L-2-Aminoadipate 6-semialdehyde + Holo-Lys2 + NADP+	Lysine	M00030	1.2.1.95	K00143
R09775	C00956 + C19885 + C00002 <=> C19886 + C00008 + C00009	L-2-Aminoadipate + alpha-Aminoadipate carrier protein LysW + ATP	LysW-gamma-L-alpha-aminoadipate + ADP + Orthophosphate	Lysine	M00031	6.3.2.43	K05827
R09776	C19886 + C00002 <=> C19887 + C00008	LysW-gamma-L-alpha-aminoadipate + ATP	LysW-gamma-L-alpha-aminoadipyl 6-phosphate + ADP	Lysine	M00031	2.7.2.-	K05828
R09777	C19887 + C00005 + C00080 <=> C19888 + C00006 + C00009	LysW-gamma-L-alpha-aminoadipyl 6-phosphate + NADPH + H+	LysW-gamma-L-alpha-aminoadipate 6-semialdehyde + NADP+ + Orthophosphate	Lysine	M00031	1.2.1.-	K05829
R09778	C19888 + C00025 <=> C19889 + C00026	LysW-gamma-L-alpha-aminoadipate 6-semialdehyde + L-Glutamate	LysW-gamma-L-lysine + 2-Oxoglutarate	Lysine	M00031	2.6.1.-	K05830
R09779	C19889 + C00001 <=> C00047 + C19885	LysW-gamma-L-lysine + H2O	L-Lysine + alpha-Aminoadipate carrier protein LysW	Lysine	M00031	-	K05831
R03098	C00956 + C00002 <=> C05560 + C00013	L-2-Aminoadipate + ATP	L-2-Aminoadipate adenylate + Diphosphate	Lysine	M00030	1.2.1.95	K00143
R00480	C00002 + C00049 <=> C00008 + C03082	ATP + L-Aspartate	ADP + 4-Phospho-L-aspartate	Lysine,Threonine,Methionine	M00016,M00525,M00526,M00527,M00018,M00017	2.7.2.4	K00928,K12524,K12525,K12526
R02291	C03082 + C00005 + C00080 <=> C00441 + C00009 + C00006	4-Phospho-L-aspartate + NADPH + H+	L-Aspartate 4-semialdehyde + Orthophosphate + NADP+	Lysine,Threonine,Methionine	M00016,M00525,M00526,M00527,M00018,M00017	1.2.1.11	K00133
R03260	C01118 + C00097 <=> C02291 + C00042	O-Succinyl-L-homoserine + L-Cysteine	L-Cystathionine + Succinate	Methionine	M00017	2.5.1.48	K01739
R01286	C02291 + C00001 <=> C00155 + C00014 + C00022	L-Cystathionine + H2O	L-Homocysteine + Ammonia + Pyruvate	Methionine	M00017	4.4.1.13	K00816,K01760,K14155
R01777	C00091 + C00263 <=> C00010 + C01118	Succinyl-CoA + L-Homoserine	CoA + O-Succinyl-L-homoserine	Methionine	M00017	2.3.1.46	K00641,K00651
R00946	C00440 + C00155 <=> C00101 + C00073	5-Methyltetrahydrofolate + L-Homocysteine	Tetrahydrofolate + L-Methionine	Methionine	M00017	2.1.1.13	K00548
R01773	C00441 + C00004 + C00080 <=> C00263 + C00003	L-Aspartate 4-semialdehyde + NADH + H+	L-Homoserine + NAD+	Methionine,Threonine	M00017,M00018	1.1.1.3	K00003,K12524,K12525
R01775	C00441 + C00005 + C00080 <=> C00263 + C00006	L-Aspartate 4-semialdehyde + NADPH + H+	L-Homoserine + NADP+	Methionine,Threonine	M00017,M00018	1.1.1.3	K00003,K12524,K12525
R09394	C00044 + C00019 + C00030 <=> C21310 + C05198 + C00073 + C00028	GTP + S-Adenosyl-L-methionine + Reduced acceptor	(8S)-3',8-Cyclo-7,8-dihydroguanosine 5'-triphosphate + 5'-Deoxyadenosine + L-Methionine + Acceptor	MoCo	M00880	4.1.99.22	K03639,K20967
R11372	C21310 + C00001 <=> C18239 + C00013	(8S)-3',8-Cyclo-7,8-dihydroguanosine 5'-triphosphate + H2O	Precursor Z + Diphosphate	MoCo	M00880	4.6.1.17	K03637,K20967
R09395	C18239 + 2 C15814 <=> C05924 + 2 C15810	Precursor Z + 2 Thiocarboxy-[sulfur-carrier protein]	Molybdopterin + 2 Sulfur-carrier protein	MoCo	M00880	2.8.1.12	K03635,K21142
R09735	C19848 + C06232 <=> C18237 + C00020 + C00001	Adenylated molybdopterin + Molybdate	Molybdoenzyme molybdenum cofactor + AMP + H2O	MoCo	M00880	2.10.1.1	K03750,K15376
R09726	C00002 + C05924 <=> C00013 + C19848	ATP + Molybdopterin	Diphosphate + Adenylated molybdopterin	MoCo	M00880	2.7.7.75	K03638,K03831,K15376
R04292	C05840 + C00111 <=> C03722 + 2 C00001 + C00009	Iminoaspartate + Glycerone phosphate	Quinolinate + 2 H2O + Orthophosphate	NAD	M00115	2.5.1.72	K03517
R00257	C00002 + C00857 + C00064 + C00001 <=> C00020 + C00013 + C00003 + C00025	ATP + Deamino-NAD+ + L-Glutamine + H2O	AMP + Diphosphate + NAD+ + L-Glutamate	NAD	M00115	6.3.5.1	K01950
R00189	C00002 + C00857 + C00014 <=> C00020 + C00013 + C00003	ATP + Deamino-NAD+ + Ammonia	AMP + Diphosphate + NAD+	NAD	M00115	6.3.1.5,6.3.5.1	K01916
R00104	C00002 + C00003 <=> C00008 + C00006	ATP + NAD+	ADP + NADP+	NADP	added manually	2.7.1.23	K00858
R03005	C00002 + C01185 <=> C00013 + C00857	ATP + Nicotinate D-ribonucleotide	Diphosphate + Deamino-NAD+	NAD	M00115	2.7.7.1,2.7.7.18	K00952,K00969,K06210,K06211,K13522,K19785
R03348	C03722 + C00119 <=> C01185 + C00013 + C00011	Quinolinate + 5-Phospho-alpha-D-ribose 1-diphosphate	Nicotinate D-ribonucleotide + Diphosphate + CO2	NAD	M00115	2.4.2.19	K00767
R07407	C00049 + C00006 <=> C05840 + C00005 + C00080	L-Aspartate + NADP+	Iminoaspartate + NADPH + H+	NAD	M00115	1.4.1.21	K06989
R07410	C00049 + C00003 <=> C05840 + C00004 + C00080	L-Aspartate + NAD+	Iminoaspartate + NADH + H+	NAD	M00115	1.4.1.21	K06989
R02035	C01236 + C00001 <=> C00345	D-Glucono-1,5-lactone 6-phosphate + H2O	6-Phospho-D-gluconate	Pentose phosphate pathway	M00004	3.1.1.31	K01057,K07404,K13937
R02736	C01172 + C00006 <=> C01236 + C00005 + C00080	beta-D-Glucose 6-phosphate + NADP+	D-Glucono-1,5-lactone 6-phosphate + NADPH + H+	Pentose phosphate pathway	M00004	1.1.1.49,1.1.1.363	K00036,K13937
R10907	C01172 + C00003 <=> C01236 + C00004 + C00080	beta-D-Glucose 6-phosphate + NAD+	D-Glucono-1,5-lactone 6-phosphate + NADH + H+	Pentose phosphate pathway	M00004	1.1.1.363,1.1.1.388	K00036,K19243
R01049	C00002 + C00117 <=> C00020 + C00119	ATP + D-Ribose 5-phosphate	AMP + 5-Phospho-alpha-D-ribose 1-diphosphate	Pentose phosphate pathway	added manually	2.7.6.1	K00948
R01830	C00279 + C00231 <=> C05345 + C00118	D-Erythrose 4-phosphate + D-Xylulose 5-phosphate	beta-D-Fructose 6-phosphate + D-Glyceraldehyde 3-phosphate	Pentose phosphate pathway	M00004	2.2.1.1	K00615
R01528	C00345 + C00006 <=> C00199 + C00011 + C00005 + C00080	6-Phospho-D-gluconate + NADP+	D-Ribulose 5-phosphate + CO2 + NADPH + H+	Pentose phosphate pathway	M00004	1.1.1.44,1.1.1.351	K00033
R10221	C00345 + C00003 <=> C00199 + C00011 + C00004 + C00080	6-Phospho-D-gluconate + NAD+	D-Ribulose 5-phosphate + CO2 + NADH + H+	Pentose phosphate pathway	M00004	1.1.1.343,1.1.1.351	K00033
R01056	C00199 <=> C00117	D-Ribulose 5-phosphate	D-Ribose 5-phosphate	Pentose phosphate pathway	M00004	5.3.1.6	-
R01827	C05382 + C00118 <=> C00279 + C05345	Sedoheptulose 7-phosphate + D-Glyceraldehyde 3-phosphate	D-Erythrose 4-phosphate + beta-D-Fructose 6-phosphate	Pentose phosphate pathway	M00004	2.2.1.2	K00616,K13810
R01529	C00199 <=> C00231	D-Ribulose 5-phosphate	D-Xylulose 5-phosphate	Pentose phosphate pathway	M00004	5.1.3.1	K01783
R02739	C00668 <=> C01172	alpha-D-Glucose 6-phosphate	beta-D-Glucose 6-phosphate	Pentose phosphate pathway	M00004	5.1.3.15,5.3.1.9	K01792,K01810,K06859,K13810,K15916
R01641	C00117 + C00231 <=> C05382 + C00118	D-Ribose 5-phosphate + D-Xylulose 5-phosphate	Sedoheptulose 7-phosphate + D-Glyceraldehyde 3-phosphate	Pentose phosphate pathway	M00004	2.2.1.1	-
R02740	C05345 <=> C00668	beta-D-Fructose 6-phosphate	alpha-D-Glucose 6-phosphate	Pentose phosphate pathway	M00004	5.3.1.9	K01810,K06859,K13810,K15916
R05338	C06019 <=> C00199 + C00067	D-arabino-Hex-3-ulose 6-phosphate	D-Ribulose 5-phosphate + Formaldehyde	Pentose phosphate pathway	added manually	4.1.2.43	K08093,K13812,K13831
R09780	C05345 <=> C06019	beta-D-Fructose 6-phosphate	D-arabino-Hex-3-ulose 6-phosphate	Pentose phosphate pathway	added manually	5.3.1.27	K08094,K13831
R00691	C00826 <=> C00079 + C00001 + C00011	L-Arogenate	L-Phenylalanine + H2O + CO2	Phenylalanine	M00910	4.2.1.51,4.2.1.91	K01713,K04518,K05359,K14170
R01373	C00254 <=> C00166 + C00001 + C00011	Prephenate	Phenylpyruvate + H2O + CO2	Phenylalanine	M00024	4.2.1.51,4.2.1.91	K01713,K04518,K05359,K14170
R00694	C00166 + C00025 <=> C00079 + C00026	Phenylpyruvate + L-Glutamate	L-Phenylalanine + 2-Oxoglutarate	Phenylalanine	M00024	2.6.1.1,2.6.1.5,2.6.1.9,2.6.1.57	K00811,K00812,K00813,K00815,K00817,K00832,K00838,K05821,K11358,K14454,K14455,K15849
R07276	C00254 + C00025 <=> C00826 + C00026	Prephenate + L-Glutamate	L-Arogenate + 2-Oxoglutarate	Phenylalanine	M00910	2.6.1.79	K15849
R10089	C00117 + C00118 + C00064 <=> C00018 + C00025 + 3 C00001 + C00009	D-Ribose 5-phosphate + D-Glyceraldehyde 3-phosphate + L-Glutamine	Pyridoxal phosphate + L-Glutamate + 3 H2O + Orthophosphate	PLP	added manually	4.3.3.6	K06215,K08681
R03314	C01165 <=> C03912 + C00001	L-Glutamate 5-semialdehyde	(S)-1-Pyrroline-5-carboxylate + H2O	Proline	M00015	-	-
R00667	C00077 + C00026 <=> C01165 + C00025	L-Ornithine + 2-Oxoglutarate	L-Glutamate 5-semialdehyde + L-Glutamate	Proline	added manually	2.6.1.13	K00819
R01248	C03912 + C00004 + C00080 <=> C00148 + C00003	(S)-1-Pyrroline-5-carboxylate + NADH + H+	L-Proline + NAD+	Proline	M00015	1.5.1.2	K00286
R03313	C03287 + C00005 + C00080 <=> C01165 + C00009 + C00006	L-Glutamyl 5-phosphate + NADPH + H+	L-Glutamate 5-semialdehyde + Orthophosphate + NADP+	Proline	M00015	1.2.1.41	K00147,K12657
R01251	C03912 + C00005 + C00080 <=> C00148 + C00006	(S)-1-Pyrroline-5-carboxylate + NADPH + H+	L-Proline + NADP+	Proline	M00015	1.5.1.2	K00286
R00239	C00002 + C00025 <=> C00008 + C03287	ATP + L-Glutamate	ADP + L-Glutamyl 5-phosphate	Proline	M00015	2.7.2.11	K00931,K12657
R00582	C01005 + C00001 <=> C00065 + C00009	O-Phospho-L-serine + H2O	L-Serine + Orthophosphate	Serine	M00020	3.1.3.3	K01079,K02203,K22305
R04173	C03232 + C00025 <=> C01005 + C00026	3-Phosphonooxypyruvate + L-Glutamate	O-Phospho-L-serine + 2-Oxoglutarate	Serine	M00020	2.6.1.52	K00831
R01513	C00197 + C00003 <=> C03232 + C00004 + C00080	3-Phospho-D-glycerate + NAD+	3-Phosphonooxypyruvate + NADH + H+	Serine	M00020	1.1.1.95	K00058
R03083	C04691 <=> C00944 + C00009	2-Dehydro-3-deoxy-D-arabino-heptonate 7-phosphate	3-Dehydroquinate + Orthophosphate	Tryptothan,Phenylalanine,Tyrosine	M00022	4.2.3.4	K01735,K13829,K13830
R01826	C00074 + C00279 + C00001 <=> C04691 + C00009	Phosphoenolpyruvate + D-Erythrose 4-phosphate + H2O	2-Dehydro-3-deoxy-D-arabino-heptonate 7-phosphate + Orthophosphate	Tryptothan,Phenylalanine,Tyrosine	M00022	2.5.1.54	K01626,K03856,K13853
R01714	C01269 <=> C00251 + C00009	5-O-(1-Carboxyvinyl)-3-phosphoshikimate	Chorismate + Orthophosphate	Tryptothan,Phenylalanine,Tyrosine	M00022	4.2.3.5	K01736
R02412	C00002 + C00493 <=> C00008 + C03175	ATP + Shikimate	ADP + Shikimate 3-phosphate	Tryptothan,Phenylalanine,Tyrosine	M00022	2.7.1.71	K00891,K13829,K13830
R03460	C00074 + C03175 <=> C00009 + C01269	Phosphoenolpyruvate + Shikimate 3-phosphate	Orthophosphate + 5-O-(1-Carboxyvinyl)-3-phosphoshikimate	Tryptothan,Phenylalanine,Tyrosine	M00022	2.5.1.19	K00800,K13830
R03084	C00944 <=> C02637 + C00001	3-Dehydroquinate	3-Dehydroshikimate + H2O	Tryptothan,Phenylalanine,Tyrosine	M00022	4.2.1.10	K03785,K03786,K13830,K13832
R02413	C02637 + C00005 + C00080 <=> C00493 + C00006	3-Dehydroshikimate + NADPH + H+	Shikimate + NADP+	Tryptothan,Phenylalanine,Tyrosine	M00022	1.1.1.25,1.1.1.282	K00014,K05887,K13830,K13832
R04620	C04895 + 3 C00001 <=> C04874 + 3 C00009	7,8-Dihydroneopterin 3'-triphosphate + 3 H2O	7,8-Dihydroneopterin + 3 Orthophosphate	THF	M00126	3.1.3.1	K01077,K01113
R05553	C11355 <=> C00568 + C00022	4-Amino-4-deoxychorismate	4-Aminobenzoate + Pyruvate	THF	added manually	4.1.3.38	K02619,K03342,K18482
R04638	C04895 + C00001 <=> C05925 + C00013	7,8-Dihydroneopterin 3'-triphosphate + H2O	Dihydroneopterin phosphate + Diphosphate	THF	M00126	3.6.1.67	K08310,K19965
R04639	C06148 <=> C04895 + C00001	2,5-Diamino-6-(5'-triphosphoryl-3',4'-trihydroxy-2'-oxopentyl)-amino-4-oxopyrimidine	7,8-Dihydroneopterin 3'-triphosphate + H2O	THF	M00126,M00841	3.5.4.16	K01495,K09007,K22391
R05046	C05922 + C00001 <=> C05923 + C00058	Formamidopyrimidine nucleoside triphosphate + H2O	2,5-Diaminopyrimidine nucleoside triphosphate + Formate	THF	M00126,M00841	3.5.4.16	K01495,K09007,K22391
R03503	C00002 + C01300 <=> C00020 + C04807	ATP + 6-(Hydroxymethyl)-7,8-dihydropterin	AMP + 6-Hydroxymethyl-7,8-dihydropterin diphosphate	THF	M00126,M00840,M00841	2.7.6.3	K00950,K07142,K13939,K13940,K13941
R03067	C04807 + C00568 <=> C00013 + C00921	6-Hydroxymethyl-7,8-dihydropterin diphosphate + 4-Aminobenzoate	Diphosphate + Dihydropteroate	THF	M00126,M00840,M00841	2.5.1.15	K00796,K13939,K13941,K18824,K18825,K18974
R01716	C00251 + C00064 <=> C11355 + C00025	Chorismate + L-Glutamine	4-Amino-4-deoxychorismate + L-Glutamate	THF	added manually	2.6.1.85	K01664,K01665,K03342,K13950
R11072	C01304 <=> C05925 + C00001	2,5-Diamino-6-(5-phospho-D-ribosylamino)pyrimidin-4(3H)-one	Dihydroneopterin phosphate + H2O	THF	M00840	4.2.1.160	K22100
R02237	C00002 + C00921 + C00025 <=> C00008 + C00009 + C00415	ATP + Dihydropteroate + L-Glutamate	ADP + Orthophosphate + Dihydrofolate	THF	M00126,M00840,M00841	6.3.2.12,6.3.2.17	K01930,K11754,K20457,K22099
R04621	C05925 + C00001 <=> C04874 + C00009	Dihydroneopterin phosphate + H2O	7,8-Dihydroneopterin + Orthophosphate	THF	M00126,M00840	3.6.1.-	-
R03504	C04874 <=> C00266 + C01300	7,8-Dihydroneopterin	Glycolaldehyde + 6-(Hydroxymethyl)-7,8-dihydropterin	THF	M00126,M00840	4.1.2.25	K01633,K09739,K13939,K13940
R03066	C01300 + C00568 <=> C00921 + C00001	6-(Hydroxymethyl)-7,8-dihydropterin + 4-Aminobenzoate	Dihydropteroate + H2O	THF	M00126,M00840,M00841	2.5.1.15	K00796,K13939,K13941,K18824,K18825,K18974
R00936	C00415 + C00004 + C00080 <=> C00101 + C00003	Dihydrofolate + NADH + H+	Tetrahydrofolate + NAD+	THF	M00126,M00840,M00841	1.5.1.3	K00287,K13938,K13998,K18589,K18590,K18591,K19643,K19644,K19645
R05048	C05923 <=> C06148	2,5-Diaminopyrimidine nucleoside triphosphate	2,5-Diamino-6-(5'-triphosphoryl-3',4'-trihydroxy-2'-oxopentyl)-amino-4-oxopyrimidine	THF	M00126,M00840,M00841	3.5.4.16	K01495,K09007,K22391
R00939	C00415 + C00005 + C00080 <=> C00101 + C00006	Dihydrofolate + NADPH + H+	Tetrahydrofolate + NADP+	THF	M00126,M00840,M00841	1.5.1.3	K00287,K13938,K13998,K18589,K18590,K18591,K19643,K19644,K19645
R00428	C00044 + C00001 <=> C05922	GTP + H2O	Formamidopyrimidine nucleoside triphosphate	THF	M00126,M00840,M00841	3.5.4.16	K01495,K09007,K22391
R11719	C04895 <=> C01300 + C21615	7,8-Dihydroneopterin 3'-triphosphate	6-(Hydroxymethyl)-7,8-dihydropterin + Glycolaldehyde triphosphate	THF	M00841	4.1.2.60	K22101
R00425	C00044 + 3 C00001 <=> C00058 + C01304 + C00013	GTP + 3 H2O	Formate + 2,5-Diamino-6-(5-phospho-D-ribosylamino)pyrimidin-4(3H)-one + Diphosphate	THF,FMN	M00840,M00125	3.5.4.25	K01497,K14652
R00617	C00002 + C01081 <=> C00008 + C00068	ATP + Thiamin monophosphate	ADP + Thiamin diphosphate	Thiamine diphosphate	M00127	2.7.4.16	K00946
R04509	C00002 + C04556 <=> C00008 + C04752	ATP + 4-Amino-2-methyl-5-(phosphooxymethyl)pyrimidine	ADP + 4-Amino-5-hydroxymethyl-2-methylpyrimidine diphosphate	Thiamine diphosphate	M00127	2.7.4.7	K00877,K00941,K14153,K21219
R05636	C00022 + C00118 <=> C11437 + C00011	Pyruvate + D-Glyceraldehyde 3-phosphate	1-Deoxy-D-xylulose 5-phosphate + CO2	Thiamine diphosphate	added manually	2.2.1.7	K01662
R10712	C04752 + C20247 <=> C01081 + C00013 + C00011	4-Amino-5-hydroxymethyl-2-methylpyrimidine diphosphate + 2-(2-Carboxy-4-methylthiazol-5-yl)ethyl phosphate	Thiamin monophosphate + Diphosphate + CO2	Thiamine diphosphate	M00127	2.5.1.3	K00788,K14153,K14154,K21219,K21220
R07459	C15810 + C00002 <=> C15813 + C00013	Sulfur-carrier protein + ATP	Adenylyl-[sulfur-carrier protein] + Diphosphate	Thiamine diphosphate	M00127	2.7.7.73,2.7.7.80	K03148,K11996,K21029,K21147
R07460	C15811 + C00097 <=> C15812 + C00041	[Enzyme]-cysteine + L-Cysteine	[Enzyme]-S-sulfanylcysteine + L-Alanine	Thiamine diphosphate	added manually	2.8.1.7	K04487
R07461	C15812 + C15813 + C00030 <=> C00020 + C15814 + C15811 + C00028	[Enzyme]-S-sulfanylcysteine + Adenylyl-[sulfur-carrier protein] + Reduced acceptor	AMP + Thiocarboxy-[sulfur-carrier protein] + [Enzyme]-cysteine + Acceptor	Thiamine diphosphate	M00127	2.8.1.4,2.8.1.11	K03151,K11996,K21028,K21147
R10246	C00082 + C00019 + C00030 <=> C15809 + C01468 + C05198 + C00073 + C00028	L-Tyrosine + S-Adenosyl-L-methionine + Reduced acceptor	Iminoglycine + 4-Cresol + 5'-Deoxyadenosine + L-Methionine + Acceptor	Thiamine diphosphate	M00127	4.1.99.19	K03150
R10247	C11437 + C15809 + C15814 <=> C20246 + C15810 + 2 C00001	1-Deoxy-D-xylulose 5-phosphate + Iminoglycine + Thiocarboxy-[sulfur-carrier protein]	2-[(2R,5Z)-2-Carboxy-4-methylthiazol-5(2H)-ylidene]ethyl phosphate + Sulfur-carrier protein + 2 H2O	Thiamine diphosphate	M00127	2.8.1.10	K03149
R09977	C20246 <=> C20247	2-[(2R,5Z)-2-Carboxy-4-methylthiazol-5(2H)-ylidene]ethyl phosphate	2-(2-Carboxy-4-methylthiazol-5-ylEthyl phosphate	Thiamine diphosphate	M00127	5.3.99.10	K10810
R03472	C03373 + C00019 <=> C04556 + C05198 + C00073 + C00058 + C00237	Aminoimidazole ribotide + S-Adenosyl-L-methionine	4-Amino-2-methyl-5-(phosphooxymethyl)pyrimidine + 5'-Deoxyadenosine + L-Methionine + Formate + CO	Thiamine diphosphate	M00127	4.1.99.17	K03147
R12026	C00003 + C00037 + C00283 <=> C00153 + C20784 + 3 C00001	NAD+ + Glycine + Hydrogen sulfide	Nicotinamide + ADP-5-ethyl-4-methylthiazole-2-carboxylate + 3 H2O	Thiamine diphosphate	added manually	2.4.2.59	K22699
R01302	C00251 <=> C00156 + C00022	Chorismate	4-Hydroxybenzoate + Pyruvate	THMPT	added manually	4.1.3.40	K03181,K18240
R11102	C00119 + C00156 <=> C21107 + C00011 + C00013	5-Phospho-alpha-D-ribose 1-diphosphate + 4-Hydroxybenzoate	4-(beta-D-Ribofuranosyl)phenol 5'-phosphate + CO2 + Diphosphate	THMPT	added manually	2.4.2.54	K06984
R10339	C04807 + C20559 <=> C20562 + C00013	6-Hydroxymethyl-7,8-dihydropterin diphosphate + 4-(beta-D-Ribofuranosyl)aniline 5'-phosphate	N-[(7,8-Dihydropterin-6-yl)methyl]-4-(beta-D-ribofuranosyl)aniline 5'-phosphate + Diphosphate	THMPT	added manually	2.5.1.105	K06897
R03388	C05927 + C00080 + C00005 <=> C01217 + C00006	7,8-Dihydromethanopterin + H+ + NADPH	5,6,7,8-Tetrahydromethanopterin + NADP+	THMPT	added manually	1.5.1.47	K17364
RMAN1	C21107 <=> C20559	4-(beta-D-Ribofuranosyl)phenol 5'-phosphate	4-(beta-D-Ribofuranosyl)aniline 5'-phosphate	THMPT	added manually	-	-	incomplete reaction, manual reconstruction
RMAN2	C20562 <=> C05927	N-[(7,8-Dihydropterin-6-yl)methyl]-4-(beta-D-ribofuranosyl)aniline 5'-phosphate	7,8-Dihydromethanopterin	THMPT	added manually	-	-	incomplete reaction, manual reconstruction
R10802	C05927 + C00030 <=> C01217 + C00028	7,8-Dihydromethanopterin + Reduced acceptor	5,6,7,8-Tetrahydromethanopterin + Acceptor	THMPT	added manually	1.5.99.15	K18853
R01771	C00002 + C00263 <=> C00008 + C01102	ATP + L-Homoserine	ADP + O-Phospho-L-homoserine	Threonine	M00018	2.7.1.39	K00872,K02203,K02204
R01466	C01102 + C00001 <=> C00188 + C00009	O-Phospho-L-homoserine + H2O	L-Threonine + Orthophosphate	Threonine	M00018	4.2.3.1	K01733
R00986	C00251 + C00064 <=> C00108 + C00022 + C00025	Chorismate + L-Glutamine	Anthranilate + Pyruvate + L-Glutamate	Tryptophan	M00023	4.1.3.27	K01656,K01657,K01658,K13497,K13501,K13503
R00985	C00251 + C00014 <=> C00108 + C00022 + C00001	Chorismate + Ammonia	Anthranilate + Pyruvate + H2O	Tryptophan	M00023	4.1.3.27	K01656,K01657,K01658,K13497,K13501,K13503
R01073	C00108 + C00119 <=> C04302 + C00013	Anthranilate + 5-Phospho-alpha-D-ribose 1-diphosphate	N-(5-Phospho-D-ribosyl)anthranilate + Diphosphate	Tryptophan	M00023	2.4.2.18	K00766,K13497
R03508	C01302 <=> C03506 + C00011 + C00001	1-(2-Carboxyphenylamino)-1-deoxy-D-ribulose 5-phosphate	Indoleglycerol phosphate + CO2 + H2O	Tryptophan	M00023	4.1.1.48	K01609,K01656,K13498,K13501
R02722	C00065 + C03506 <=> C00078 + C00118 + C00001	L-Serine + Indoleglycerol phosphate	L-Tryptophan + D-Glyceraldehyde 3-phosphate + H2O	Tryptophan	M00023	4.2.1.20	K01694,K01695,K01696,K06001
R03509	C04302 <=> C01302	N-(5-Phospho-D-ribosyl)anthranilate	1-(2-Carboxyphenylamino)-1-deoxy-D-ribulose 5-phosphate	Tryptophan	M00023	5.3.1.24	K01817,K13498,K13501
R00733	C00826 + C00006 <=> C00082 + C00011 + C00005 + C00080	L-Arogenate + NADP+	L-Tyrosine + CO2 + NADPH + H+	Tyrosine	M00040	1.3.1.78,1.3.1.79	K15226,K15227
R00732	C00826 + C00003 <=> C00082 + C00011 + C00004 + C00080	L-Arogenate + NAD+	L-Tyrosine + CO2 + NADH + H+	Tyrosine	M00040	1.3.1.43,1.3.1.79	K00220
R01730	C00254 + C00006 <=> C01179 + C00011 + C00005 + C00080	Prephenate + NADP+	3-(4-Hydroxyphenyl)pyruvate + CO2 + NADPH + H+	Tyrosine	M00025	1.3.1.13	K00211
R01728	C00254 + C00003 <=> C01179 + C00011 + C00004 + C00080	Prephenate + NAD+	3-(4-Hydroxyphenyl)pyruvate + CO2 + NADH + H+	Tyrosine	M00025	1.3.1.12	K00210,K00220,K04517,K14187
R00734	C01179 + C00025 <=> C00082 + C00026	3-(4-Hydroxyphenyl)pyruvate + L-Glutamate	L-Tyrosine + 2-Oxoglutarate	Tyrosine	M00025	2.6.1.1,2.6.1.5,2.6.1.9,2.6.1.57	K00811,K00812,K00813,K00815,K00817,K00832,K00838,K05821,K11358,K14454,K14455,K15849
R01715	C00251 <=> C00254	Chorismate	Prephenate	Tyrosine,Phenylalanine	M00024,M00025,M00040,M00910	5.4.99.5	K01850,K04092,K04093,K04516,K06208,K06209,K13853,K14170,K14187
R01731	C00049 + C00254 <=> C00036 + C00826	L-Aspartate + Prephenate	Oxaloacetate + L-Arogenate	Tyrosine,Phenylalanine	M00040,M00910	2.6.1.57,2.6.1.78	K00832,K15849
R00575	2 C00002 + C00064 + C00288 + C00001 <=> 2 C00008 + C00009 + C00025 + C00169	2 ATP + L-Glutamine + HCO3- + H2O	2 ADP + Orthophosphate + L-Glutamate + Carbamoyl phosphate	Pyrimidine	M00051	6.3.5.5	K01954,K01955,K01956,K11540,K11541
R01867	C00337 + C00122 <=> C00295 + C00042	(S)-Dihydroorotate + Fumarate	Orotate + Succinate	Pyrimidine	M00051	1.3.98.1	K00226
R01870	C00295 + C00119 <=> C01103 + C00013	Orotate + 5-Phospho-alpha-D-ribose 1-diphosphate	Orotidine 5'-phosphate + Diphosphate	Pyrimidine	M00051	2.4.2.10	K00762,K13421
R01869	C00337 + C00003 <=> C00295 + C00080 + C00004	(S)-Dihydroorotate + NAD+	Orotate + H+ + NADH	Pyrimidine	M00051	1.3.1.14	K17828
R00965	C01103 <=> C00105 + C00011	Orotidine 5'-phosphate	UMP + CO2	Pyrimidine	M00051	4.1.1.23	K01591,K13421
R01397	C00169 + C00049 <=> C00009 + C00438	Carbamoyl phosphate + L-Aspartate	Orthophosphate + N-Carbamoyl-L-aspartate	Pyrimidine	M00051	2.1.3.2	K00608,K00609,K00610,K11540,K11541
R01993	C00438 <=> C00337 + C00001	N-Carbamoyl-L-aspartate	(S)-Dihydroorotate + H2O	Pyrimidine	M00051	3.5.2.3	K01465,K11540
R00156	C00002 + C00015 <=> C00008 + C00075	ATP + UDP	ADP + UTP	Pyrimidine	M00052	2.7.4.6	K00940,K18533
R00158	C00002 + C00105 <=> C00008 + C00015	ATP + UMP	ADP + UDP	Pyrimidine	M00052	2.7.4.4,2.7.4.14,2.7.4.22	K00945,K09903,K13799,K13800,K13809
R04441	C04272 <=> C00141 + C00001	(R)-2,3-Dihydroxy-3-methylbutanoate	3-Methyl-2-oxobutanoic acid + H2O	Valine,Isoleucine	M00019	4.2.1.9	K01687
R00226	2 C00022 <=> C06010 + C00011	2 Pyruvate	(S)-2-Acetolactate + CO2	Valine,Isoleucine	M00019	2.2.1.6	K01652,K01653,K11258
R01214_1	C00141 + C00025 <=> C00183 + C00026	3-Methyl-2-oxobutanoic acid + L-Glutamate	L-Valine + 2-Oxoglutarate	Valine,Isoleucine	M00019	-	-
R05071	C06010 <=> C04181	(S)-2-Acetolactate	3-Hydroxy-3-methyl-2-oxobutanoic acid	Valine,Isoleucine	M00019	1.1.1.86,5.4.99.3	K00053
R04440	C04181 + C00005 + C00080 <=> C04272 + C00006	3-Hydroxy-3-methyl-2-oxobutanoic acid + NADPH + H+	(R)-2,3-Dihydroxy-3-methylbutanoate + NADP+	Valine,Isoleucine	M00019	1.1.1.86	K00053
R10935	2 C00118 <=> C20954 + C00009 + 2 C00001	2 D-Glyceraldehyde 3-phosphate	(5-Formylfuran-3-yl)methyl phosphate + Orthophosphate + 2 H2O	Methanofuran	M00935	-	K09733
R11038	C20954 + C00041 <=> C21068 + C00022	(5-Formylfuran-3-yl)methyl phosphate + L-Alanine	[5-(Aminomethyl)furan-3-yl]methyl phosphate + Pyruvate	Methanofuran	M00935	-	K19793
R11039	C21068 + C00002 <=> C21069 + C00008	[5-(Aminomethyl)furan-3-yl]methyl phosphate + ATP	[5-(Aminomethyl)furan-3-yl]methyl diphosphate + ADP	Methanofuran	M00935	-	K07144
R00736	C00082 <=> C00483 + C00011	L-Tyrosine	Tyramine + CO2	Methanofuran	M00935	-	K01592,K01593,K18933
R10902	C00002 + C00483 + C00025 <=> C00008 + C00009 + C20926	ATP + Tyramine + L-Glutamate	ADP + Orthophosphate + gamma-Glutamyltyramine	Methanofuran	M00935	-	K06914
R11040	C21069 + C20926 <=> C21070 + C00013	[5-(Aminomethyl)furan-3-yl]methyl diphosphate + gamma-Glutamyltyramine	(4-{4-[2-(gamma-L-Glutamylamino)ethyl]phenoxymethyl}furan-2-yl)methanamine + Diphosphate	Methanofuran	M00935	-	K07072
RMAN3	C21070 <=> C00862	(4-{4-[2-(gamma-L-Glutamylamino)ethyl]phenoxymethyl}furan-2-yl)methanamine	Methanofuran	Methanofuran	added manually	-	-	incomplete reaction, manual reconstruction
RMAN4	C00011 + C00282 <=> C00058 + C00080	CO2 + Hydrogen	Formate + H+	added manually	added manually	-	-
R01195	2 C00138 + C00006 + C00080 <=> 2 C00139 + C00005	2 Reduced ferredoxin + NADP+ + H+	2 Oxidized ferredoxin + NADPH	added manually	added manually	1.18.1.2	-
R00315	C00008 + C00227 <=> C00002 + C00033	ADP + Acetyl phosphate	ATP + Acetate	added manually	added manually	2.7.2.1,2.7.2.15	K00925
R00230	C00024 + C00009 <=> C00010 + C00227	Acetyl-CoA + Orthophosphate	CoA + Acetyl phosphate	added manually	added manually	2.3.1.8	K00625,K04020,K13788,K15024
R00019	C00282 + 2 C00139 <=> 2 C00138 + 2 C00080	Hydrogen + 2 Oxidized ferredoxin	2 Reduced ferredoxin + 2 H+	added manually	added manually	1.12.7.2,1.12.99.-	K00532,K00533,K00534,K06441,K14126,K14127,K14128,K18016,K018017, K18023
